# Supplementary material for: Protein precoating modulates biomolecular coronas and nanocapsule–immune cell interactions in human blood
Source: Royal Society of Chemistry journal article supplement (doi:10.1039/d2tb00672c), 2022-01-01
Supplement: d2tb00672c1.pdf [file d2tb00672c1.pdf]

## Supporting Information

### **Protein Precoating Modulates Biomolecular Coronas and Nanocapsule–Immune Cell**

#### **Interactions in Human Blood**

*Shiyao Li,<sup>a</sup> Yi Ju,<sup>\*a,b</sup> Jiajing Zhou,<sup>†a</sup> Matthew Faria,<sup>c</sup> Ching-Seng Ang,<sup>d</sup> Andrew J. Mitchell,<sup>e</sup> Qi-Zhi Zhong,<sup>a</sup> Tian Zheng,<sup>e</sup> Stephen J. Kent<sup>\*f</sup> and Frank Caruso<sup>\*a</sup>*

<sup>a</sup>Department of Chemical Engineering, The University of Melbourne, Parkville, Victoria 3010, Australia. Email: y.ju@unimelb.edu.au, fcaruso@unimelb.edu.au.

<sup>b</sup>School of Health and Biomedical Sciences, RMIT University, Bundoora, Victoria 3083, Australia. Email: david.ju@rmit.edu.au.

<sup>c</sup>Systems Biology Laboratory, School of Mathematics and Statistics, and the Department of Biomedical Engineering, The University of Melbourne, Parkville, Victoria 3010, Australia.

<sup>d</sup>Bio21 Molecular Science and Biotechnology Institute, The University of Melbourne, Parkville, Victoria 3010, Australia.

<sup>e</sup>Department of Chemical Engineering, Materials Characterisation and Fabrication Platform, The University of Melbourne, Parkville, Victoria 3010, Australia.

<sup>f</sup>Department of Microbiology and Immunology, Peter Doherty Institute for Infection and Immunity, The University of Melbourne, Parkville, Victoria 3010, Australia. Email: skent@unimelb.edu.au.

<sup>†</sup> Present address: Department of NanoEngineering, University of California San Diego, La Jolla, California 92093, United States.

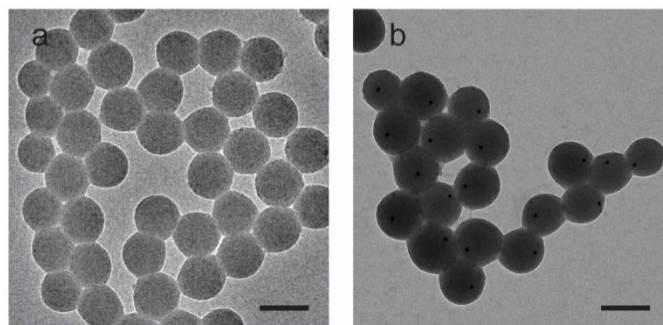

**Figure S1.** TEM images of 100 nm (a) BDT templates and (b) Au@BDT templates. Scale bars are 100 nm.

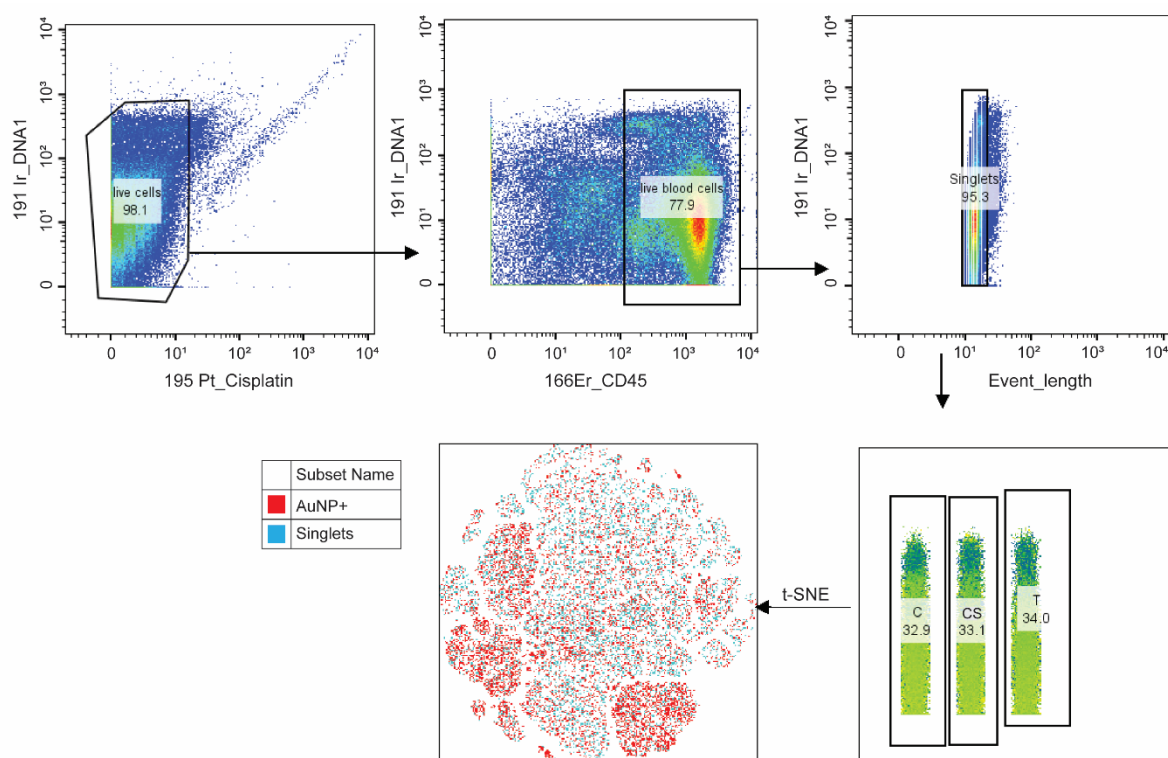

**Figure S2.** Analysis of mass cytometry data of blood assays. Mass cytometry data from whole blood assays of uncoated nanoparticles were concatenated, and DNA+ (193Ir+) and live (Cisplatin-) blood (CD45+) singlet (Event-Length<sup>lo</sup>) events were selected. t-SNE was performed on the concatenated file. Events from blood samples of the same nanoparticle type were the selected and cells that had associated nanoparticles were overlaid on the t-SNE plot from the corresponding blood samples.

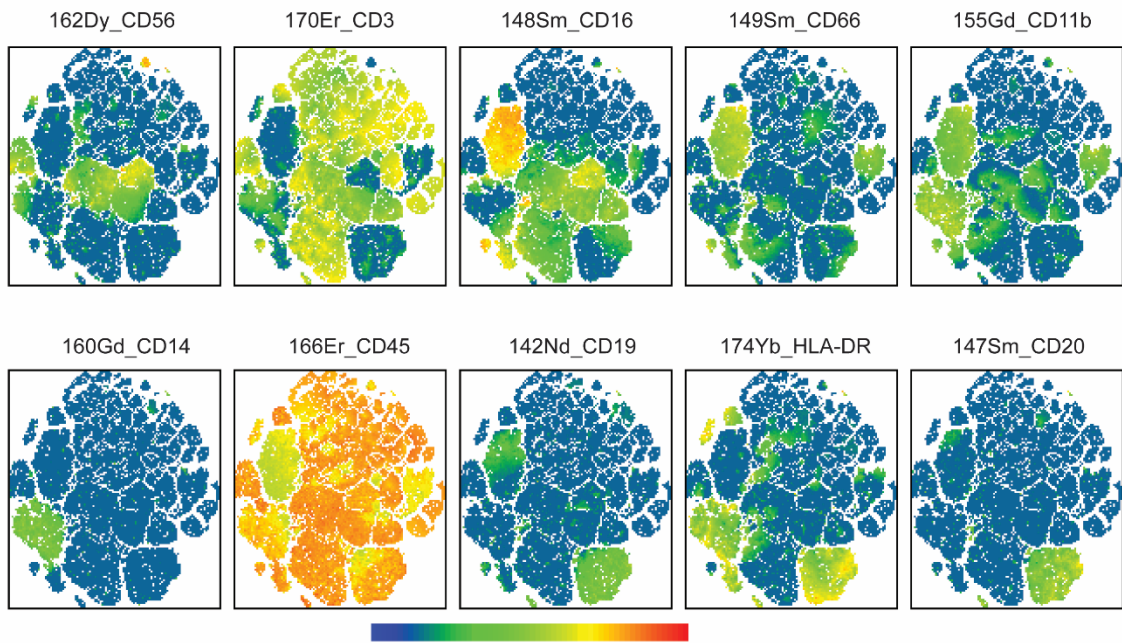

**Figure S3.** Expression intensity of cell markers in the t-SNE plot of the concatenated sample. Cell populations of different leukocyte types were gated by the expression of specific cell markers.

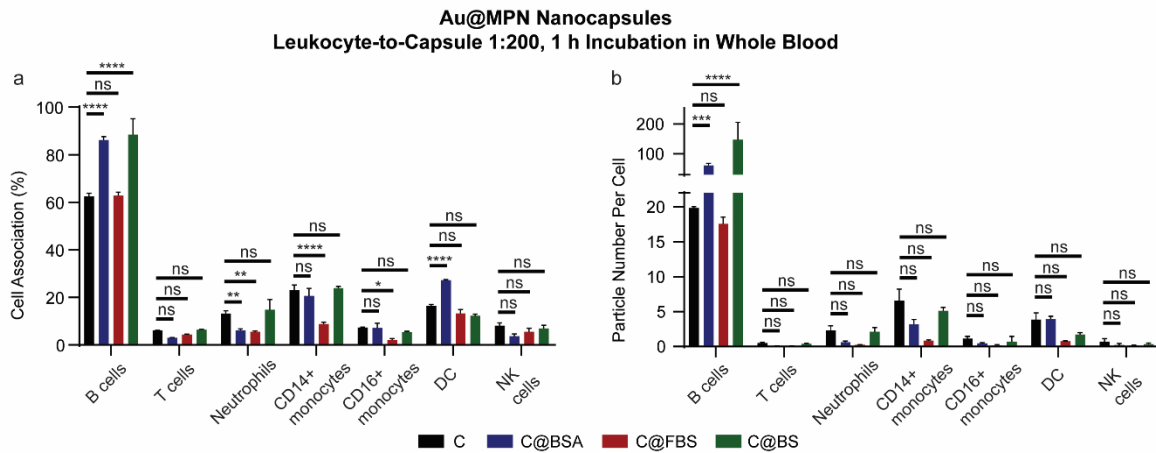

**Figure S4.** Whole blood association at a leukocyte-to-capsule ratio of 1:200 after 1 h incubation, measured as (a) percentage of association (%) and (b) number of particles per cell, of uncoated 100 nm Au@MPN nanocapsules (C) and BSA-, FBS-, or BS-precoated 100 nm Au@MPN nanocapsules (C@BSA, C@FBS, or C@BS) with B cells, T cells, neutrophils, CD14+ and CD16+ monocytes, DC, or NK cells with statistical analysis included: ns,  $p$ -value > 0.05; \*  $p$ -value < 0.05; \*\*  $p$ -value < 0.01; \*\*\*  $p$ -value < 0.001; \*\*\*\*  $p$ -value < 0.0001 (determined by two-way ANOVA).

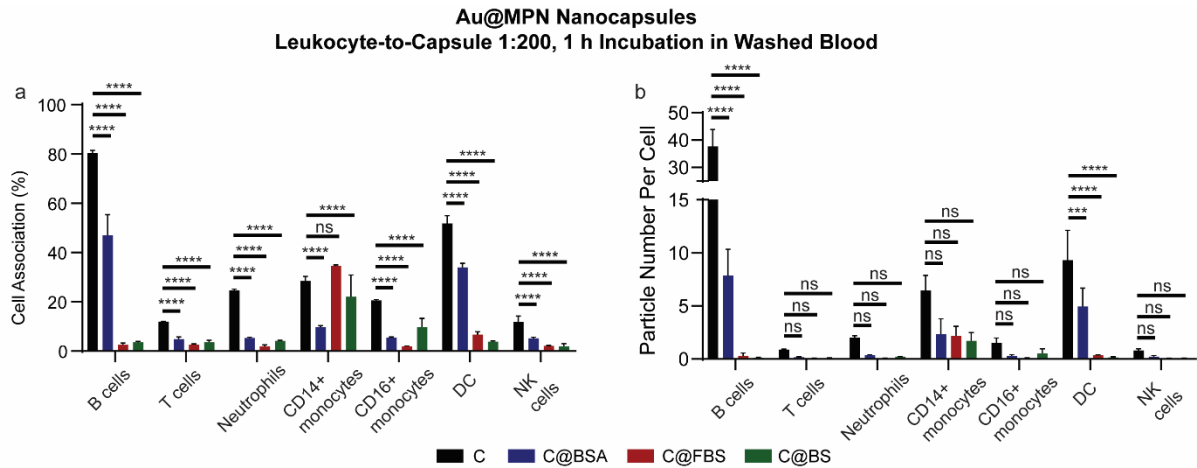

**Figure S5.** Washed blood association at a leukocyte-to-capsule ratio of 1:200 after 1 h incubation, measured as (a) percentage of association (%) and (b) number of particles per cell, of uncoated 100 nm Au@MPN nanocapsules (C) and BSA-, FBS-, or BS-precoated 100 nm Au@MPN nanocapsules (C@BSA, C@FBS, or C@BS) with B cells, T cells, neutrophils, CD14+ and CD16+ monocytes, DC, or NK cells with statistical analysis included: ns,  $p$ -value > 0.05; \*  $p$ -value < 0.05; \*\*  $p$ -value < 0.01; \*\*\*  $p$ -value < 0.001; \*\*\*\*  $p$ -value < 0.0001 (determined by two-way ANOVA).

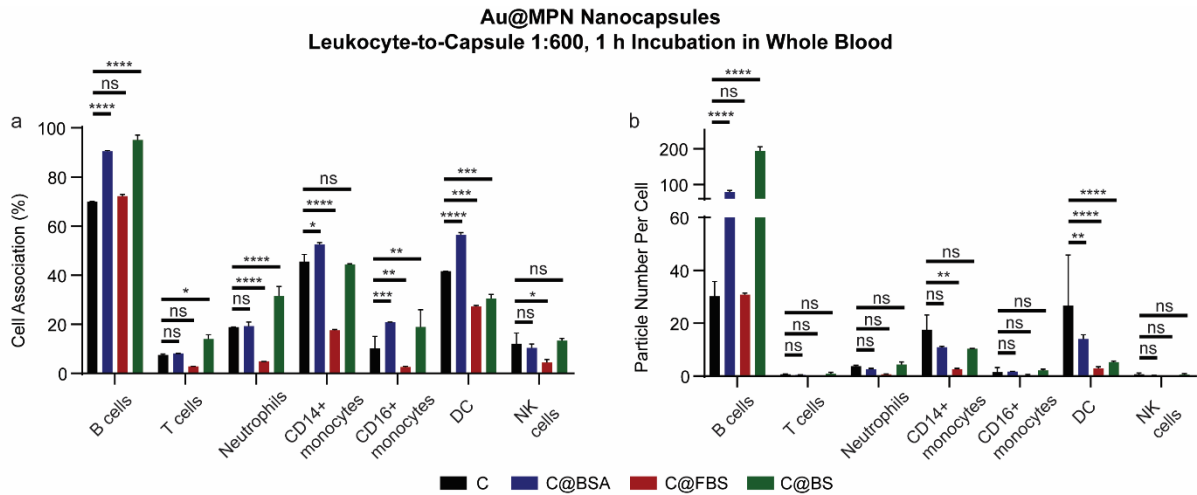

**Figure S6.** Whole blood association at a leukocyte-to-capsule ratio of 1:600 after 1 h incubation, measured as (a) percentage of association (%) and (b) number of particles per cell, of uncoated 100 nm Au@MPN nanocapsules (C) and BSA-, FBS-, or BS-precoated 100 nm Au@MPN nanocapsules (C@BSA, C@FBS, or C@BS) with B cells, T cells, neutrophils, CD14+ and CD16+ monocytes, DC, or NK cells with statistical analysis included: ns,  $p$ -value > 0.05; \*  $p$ -value < 0.05; \*\*  $p$ -value < 0.01; \*\*\*  $p$ -value < 0.001; \*\*\*\*  $p$ -value < 0.0001 (determined by two-way ANOVA).

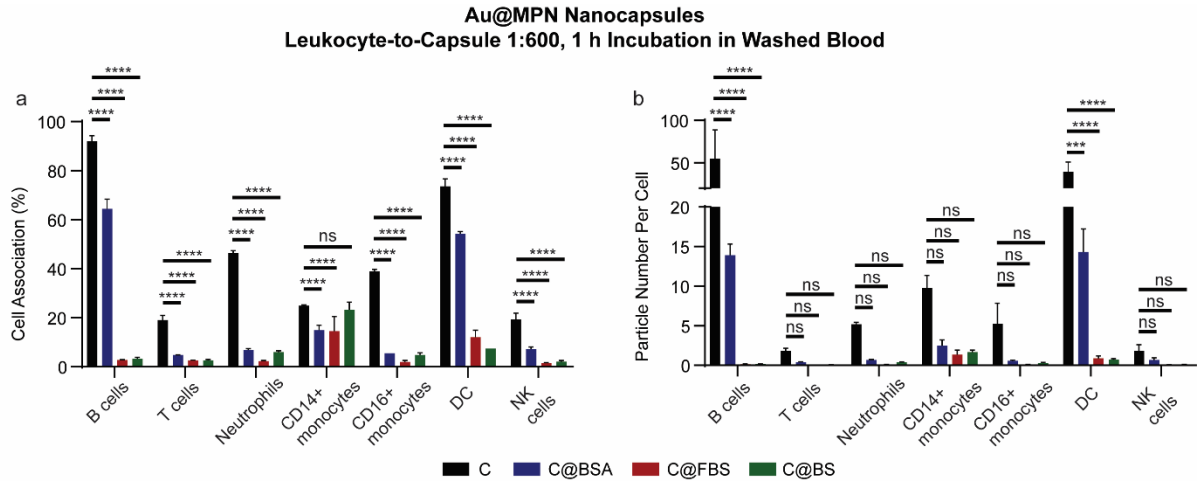

**Figure S7.** Washed blood association at a leukocyte-to-capsule ratio of 1:600 after 1 h incubation, measured as (a) percentage of association (%) and (b) number of particles per cell, of uncoated 100 nm Au@MPN nanocapsules (C) and BSA-, FBS-, or BS-precoated 100 nm Au@MPN nanocapsules (C@BSA, C@FBS, or C@BS) with B cells, T cells, neutrophils, CD14+ and CD16+ monocytes, DC, or NK cells with statistical analysis included: ns,  $p$ -value > 0.05; \*  $p$ -value < 0.05; \*\*  $p$ -value < 0.01; \*\*\*  $p$ -value < 0.001; \*\*\*\*  $p$ -value < 0.0001 (determined by two-way ANOVA).

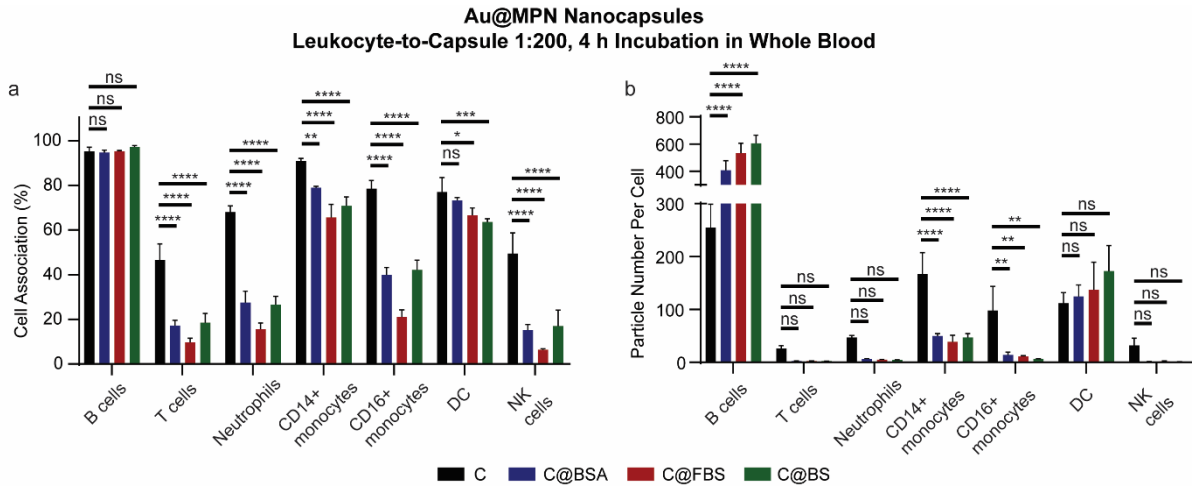

**Figure S8.** Whole blood association cells at a leukocyte-to-capsule ratio of 1:200 after 4 h incubation, measured as (a) percentage of association (%) and (b) number of particles per cell, of uncoated 100 nm Au@MPN nanocapsules (C) and BSA-, FBS-, or BS-precoated 100 nm Au@MPN nanocapsules (C@BSA, C@FBS, or C@BS) with B cells, T cells, neutrophils, CD14+ and CD16+ monocytes, DC, or NK with statistical analysis included: ns,  $p$ -value > 0.05; \*  $p$ -value < 0.05; \*\*  $p$ -value < 0.01; \*\*\*  $p$ -value < 0.001; \*\*\*\*  $p$ -value < 0.0001 (determined by two-way ANOVA).

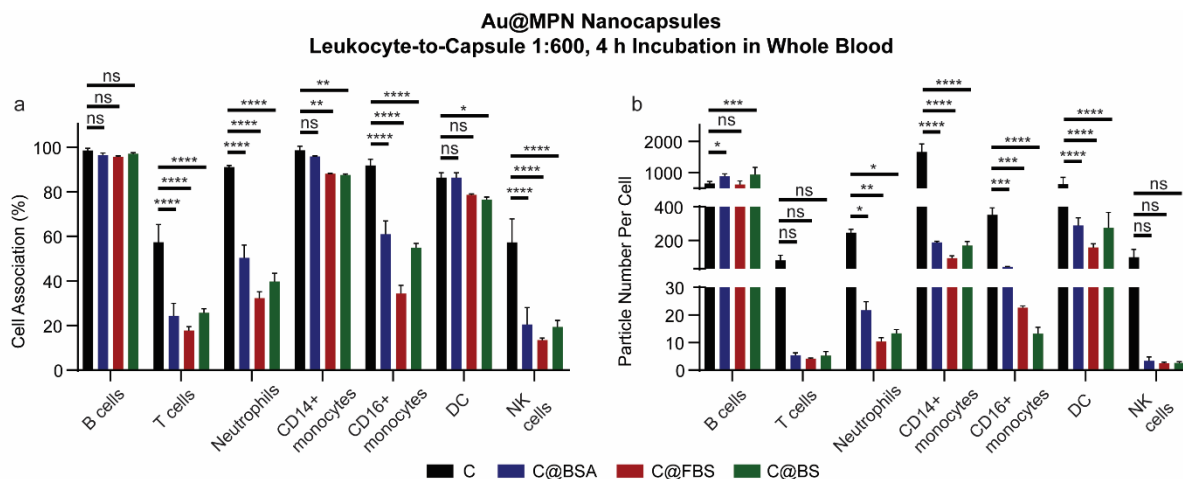

**Figure S9.** Whole blood association at a leukocyte-to-capsule ratio of 1:600 after 4 h incubation, measured as (a) percentage of association (%) and (b) number of particles per cell, of uncoated 100 nm Au@MPN nanocapsules (C) and BSA-, FBS-, or BS-precoated 100 nm Au@MPN nanocapsules (C@BSA, C@FBS, or C@BS) with B cells, T cells, neutrophils, CD14+ and CD16+ monocytes, DC, or NK cells with statistical analysis included: ns,  $p$ -value > 0.05; \*  $p$ -value < 0.05; \*\*  $p$ -value < 0.01; \*\*\*  $p$ -value < 0.001; \*\*\*\*  $p$ -value < 0.0001 (determined by two-way ANOVA).

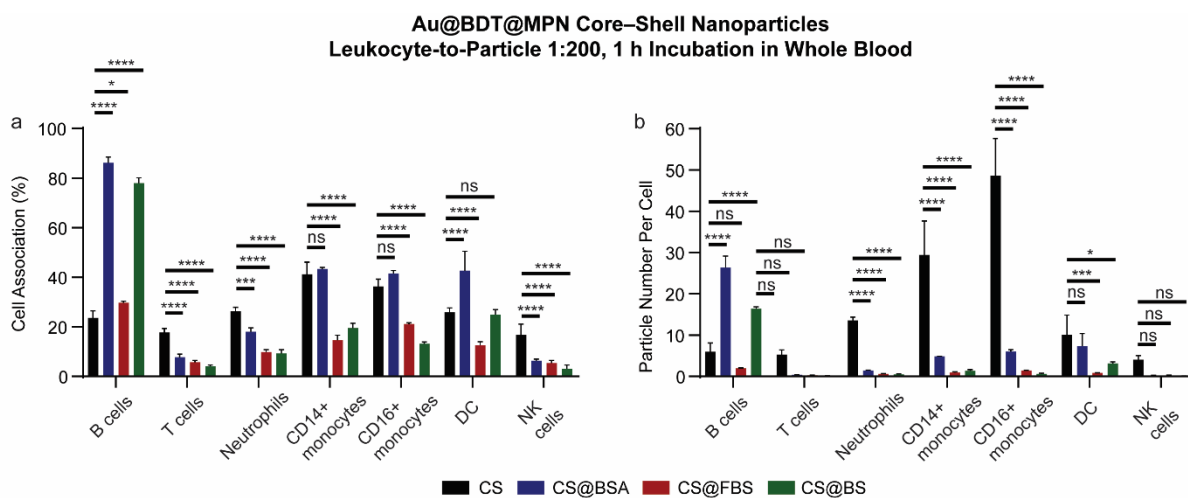

**Figure S10.** Whole blood association at a leukocyte-to-particle ratio of 1:200 after 1 h incubation, measured as (a) percentage of association (%) and (b) number of particles per cell, of uncoated 100 nm Au@BDT@MPN core-shell nanoparticles (CS) and BSA-, FBS-, or BS-precoated 100 nm Au@BDT@MPN core-shell nanoparticles (CS@BSA, CS@FBS, or CS@BS) with B cells, T cells, neutrophils, CD14+ and CD16+ monocytes, DC, or NK cells with statistical analysis included: ns,  $p$ -value > 0.05; \*  $p$ -value < 0.05; \*\*  $p$ -value < 0.01; \*\*\*  $p$ -value < 0.001; \*\*\*\*  $p$ -value < 0.0001 (determined by two-way ANOVA).

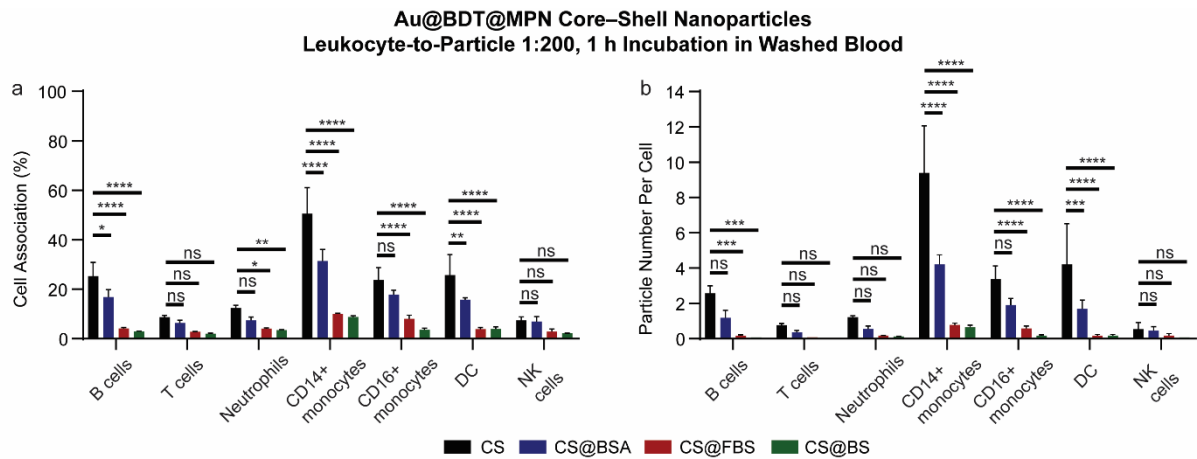

**Figure S11.** Washed blood association at a leukocyte-to-particle ratio of 1:200 after 1 h incubation, measured as (a) percentage of association (%) and (b) number of particles per cell, of uncoated 100 nm Au@BDT@MPN core-shell nanoparticles (CS) and BSA-, FBS-, or BS-precoated 100 nm Au@BDT@MPN core-shell nanoparticles (CS@BSA, CS@FBS, or CS@BS) with B cells, T cells, neutrophils, CD14+ and CD16+ monocytes, DC, or NK cells with statistical analysis included: ns,  $p$ -value > 0.05; \*  $p$ -value < 0.05; \*\*  $p$ -value < 0.01; \*\*\*  $p$ -value < 0.001; \*\*\*\*  $p$ -value < 0.0001 (determined by two-way ANOVA).

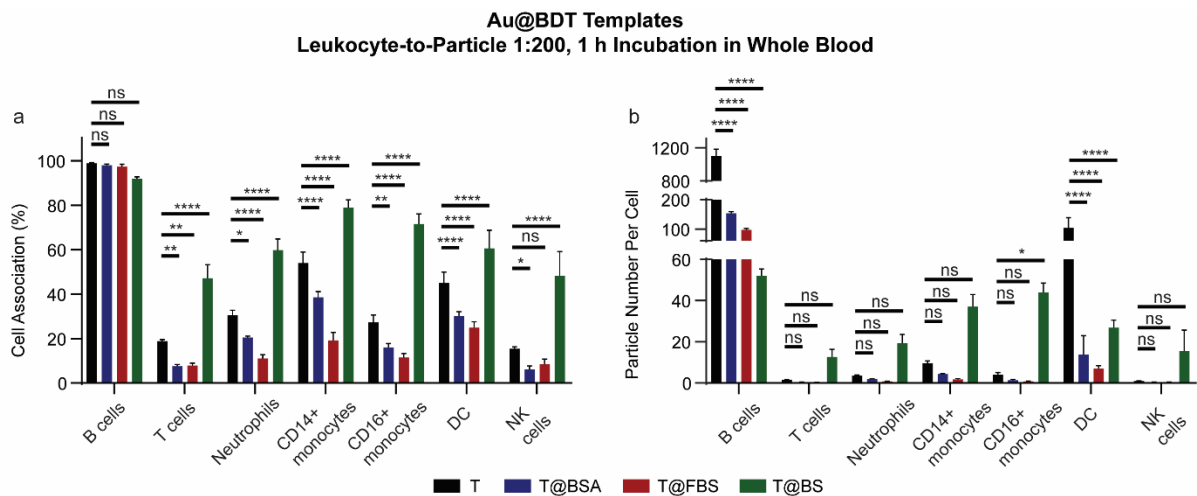

**Figure S12.** Whole blood association at a leukocyte-to-particle ratio of 1:200 after 1 h incubation, measured as (a) percentage of association (%) and (b) number of particles per cell, of uncoated 100 nm Au@BDT templates (T) and BSA-, FBS-, or BS-precoated 100 nm Au@BDT templates (T@BSA, T@FBS, or T@BS) with B cells, T cells, neutrophils, CD14+ and CD16+ monocytes, DC, or NK cells with statistical analysis included: ns,  $p$ -value > 0.05; \*  $p$ -value < 0.05; \*\*  $p$ -value < 0.01; \*\*\*  $p$ -value < 0.001; \*\*\*\*  $p$ -value < 0.0001 (determined by two-way ANOVA).

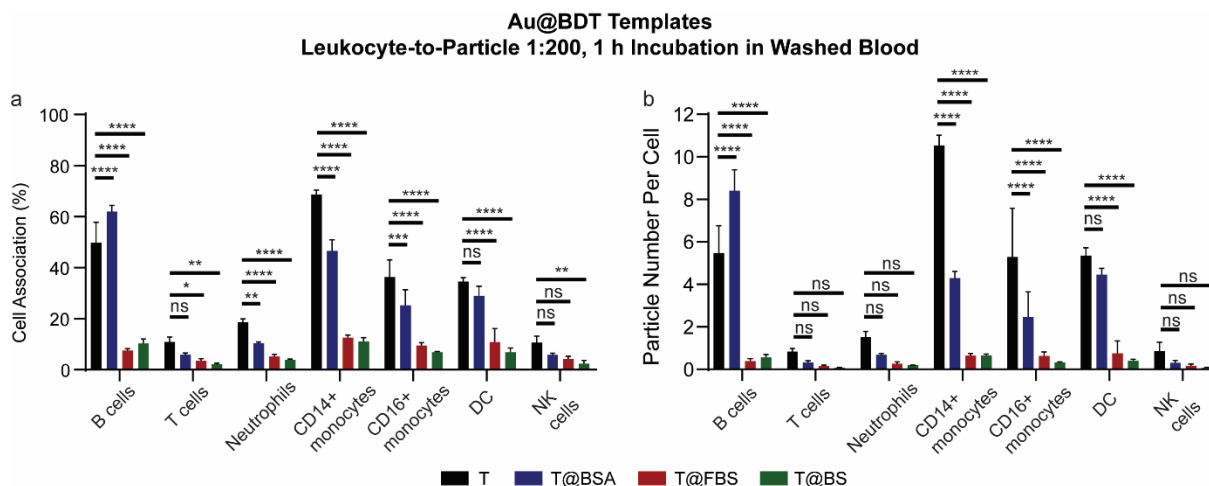

**Figure S13.** Washed blood association at a leukocyte-to-particle ratio of 1:200 after 1 h incubation, measured as (a) percentage of association (%) and (b) number of particles per cell, of uncoated 100 nm Au@BDT templates (T) and BSA-, FBS-, or BS-precoated 100 nm Au@BDT templates (T@BSA, T@FBS, or T@BS with B cells, T cells, neutrophils, CD14+ and CD16+ monocytes, DC, or NK cells with statistical analysis included: ns,  $p$ -value > 0.05; \*  $p$ -value < 0.05; \*\*  $p$ -value < 0.01; \*\*\*  $p$ -value < 0.001; \*\*\*\*  $p$ -value < 0.0001 (determined by two-way ANOVA).

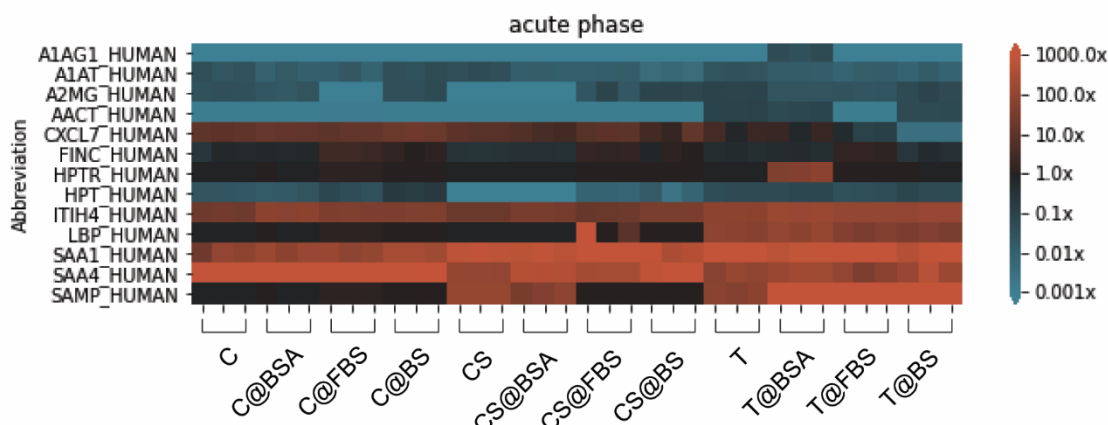

**Figure S14.** Heatmap of the enrichment indexes of acute phase proteins in the protein coronas of the Au@BDT templates (T), Au@BDT@MPN core-shell nanoparticles (CS), and Au@MPN nanocapsules (C) without and with precoating with BSA, FBS, or BS. The proteins are listed alphabetically in a colored log scale. Three replicates of each nanoparticle system were examined.



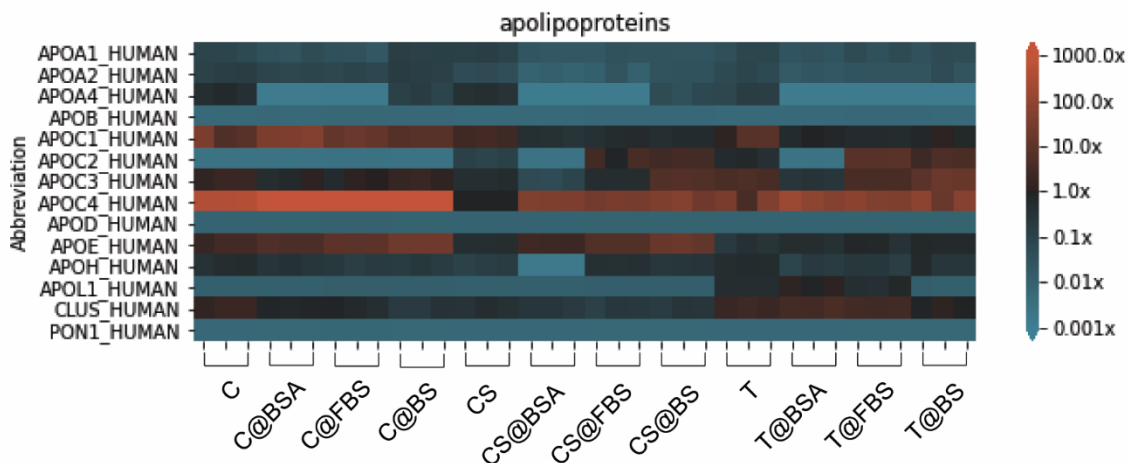

**Figure S15.** Heatmap of the enrichment indexes of apolipoproteins in the protein coronas of the Au@BDT templates (T), Au@BDT@MPN core–shell nanoparticles (CS), and Au@MPN nanocapsules (C) without and with precoating with BSA, FBS, or BS. The proteins are listed alphabetically in a colorized log scale. Three replicates of each nanoparticle system were examined.

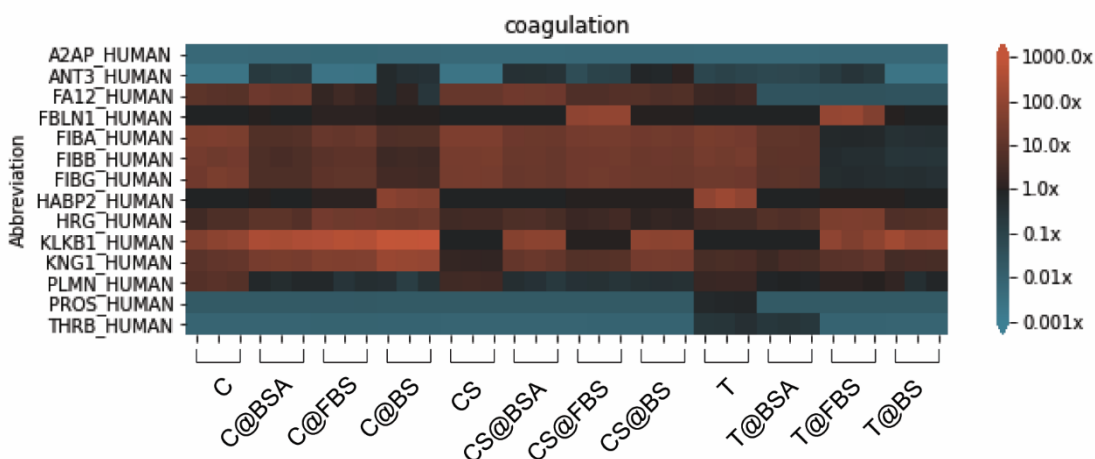

**Figure S16.** Heatmap of the enrichment indexes of coagulation proteins in the protein coronas of the Au@BDT templates (T), Au@BDT@MPN core–shell nanoparticles (CS), and Au@MPN nanocapsules (C) without and with precoating with BSA, FBS, or BS. The proteins are listed alphabetically in a colorized log scale. Three replicates of each nanoparticle system were examined.

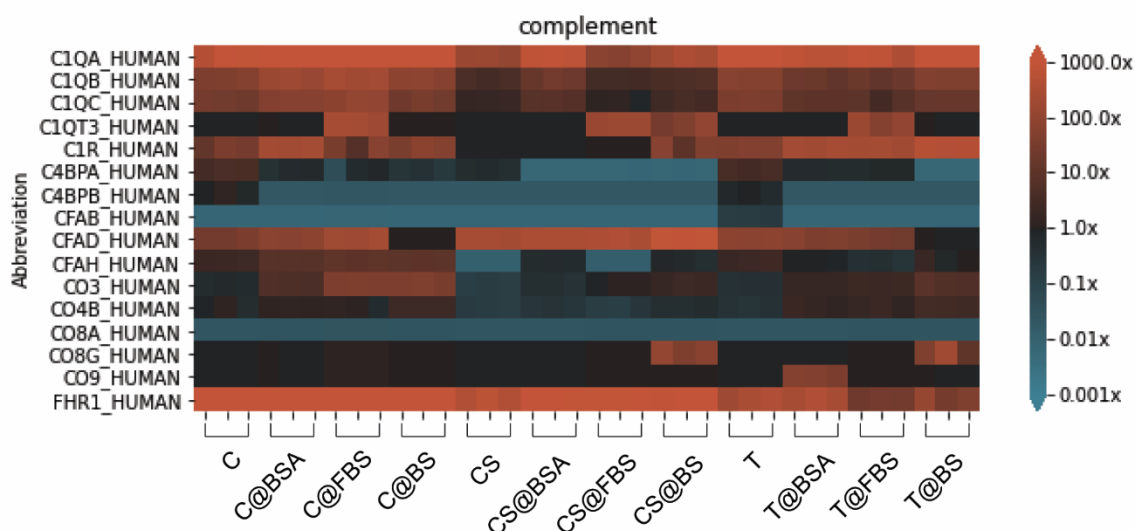

**Figure S17.** Heatmap of the enrichment indexes of complements in the protein coronas of the Au@BDT templates (T), Au@BDT@MPN core–shell nanoparticles (CS), and Au@MPN nanocapsules (C) without and with precoating with BSA, FBS, or BS. The proteins are listed alphabetically in a colorized log scale. Three replicates of each nanoparticle system were examined.

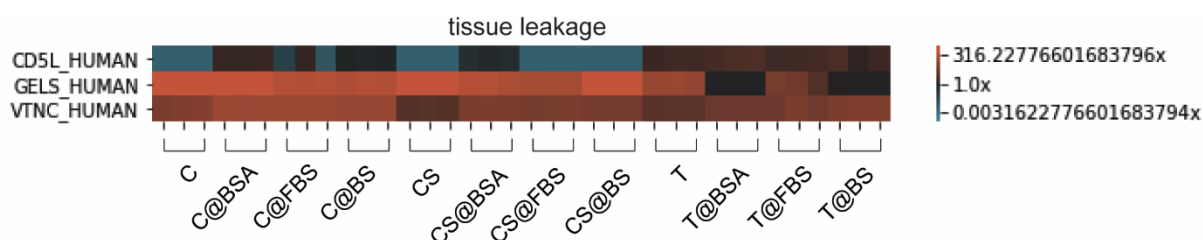

**Figure S18.** Heatmap of the enrichment indexes of tissue leakage proteins in the protein coronas of the Au@BDT templates (T), Au@BDT@MPN core–shell nanoparticles (CS), and Au@MPN nanocapsules (C) without and with precoating with BSA, FBS, or BS. The proteins are listed alphabetically in a colorized log scale. Three replicates of each nanoparticle system were examined.

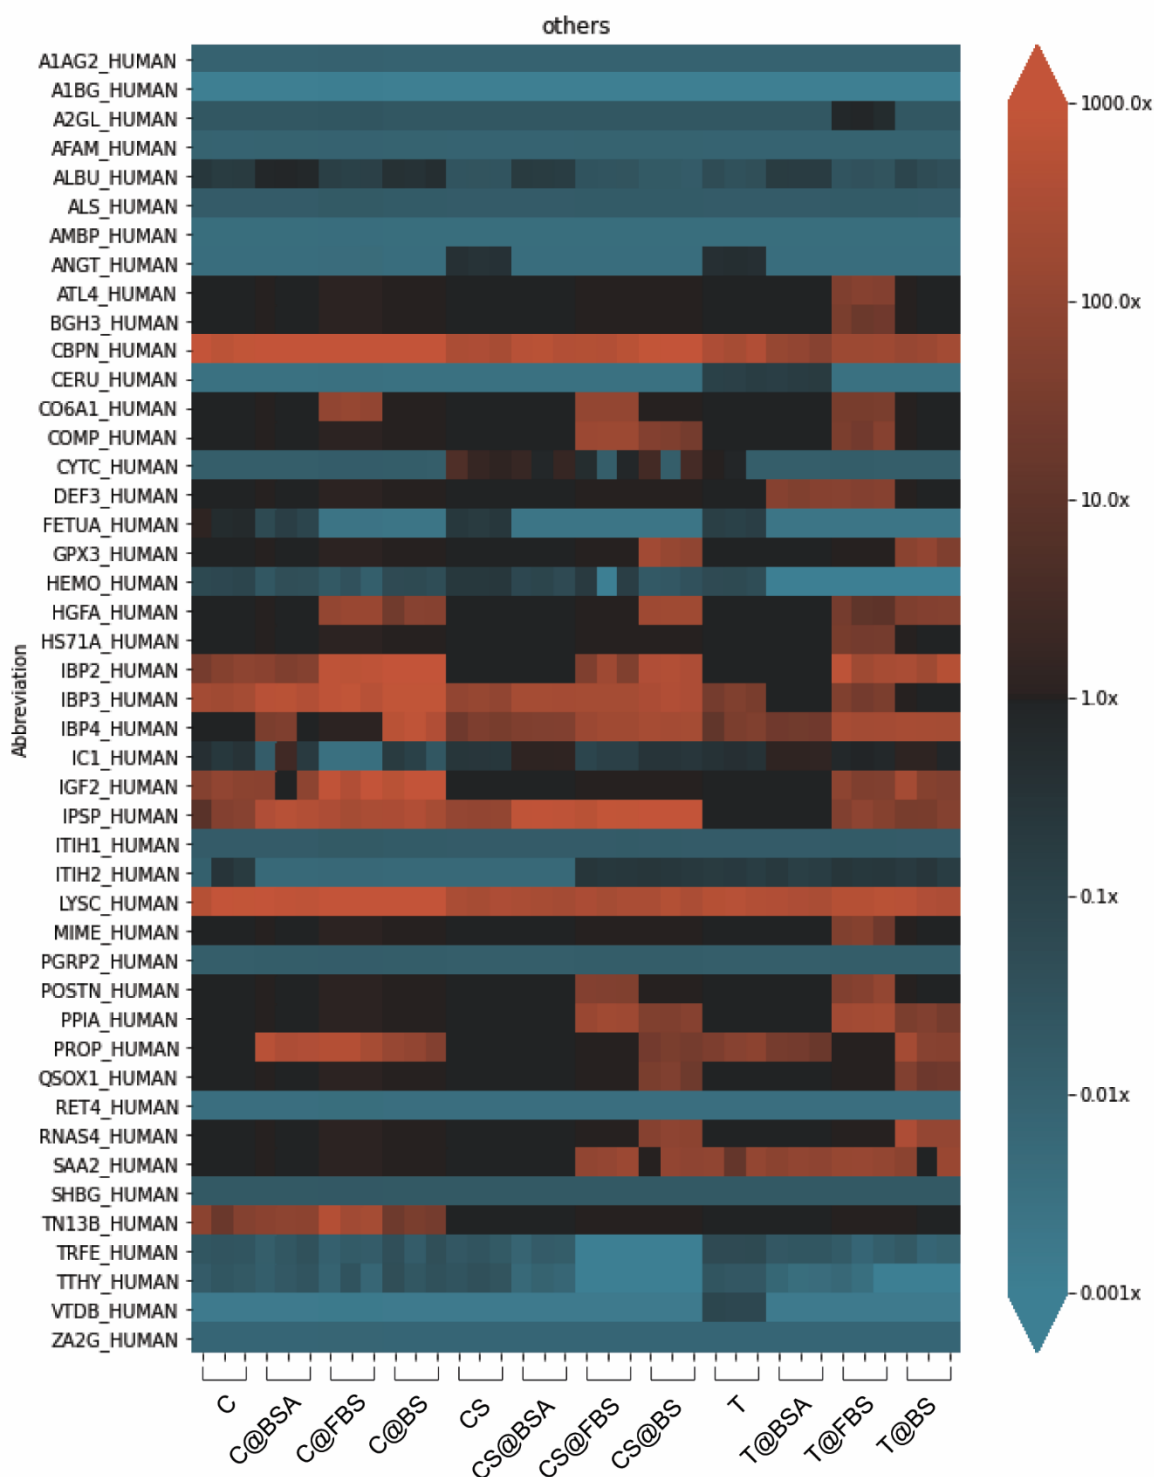

**Figure S19.** Heatmap of the enrichment indexes of other proteins in the protein coronas of the Au@BDT templates (T), Au@BDT@MPN core-shell nanoparticles (CS), and Au@MPN nanocapsules (C) without and with precoating with BSA, FBS, or BS. The proteins are listed alphabetically in a colorized log scale. Three replicates of each nanoparticle system were examined.

**Table S1.** Average size,  $\zeta$ -potential, and thickness of the Au@BDT templates (T), Au@BDT@MPN core-shell nanoparticles (CS), and Au@MPN nanocapsules (C) without and with precoating with bovine serum albumin (BSA), fetal bovine serum (FBS), or bovine serum (BS), followed by incubation in human plasma (HP)

| Sample    | Average size <sup>a</sup> (nm) | $\zeta$ -potential in buffer <sup>b</sup> (mV) | Thickness <sup>c</sup> (nm) |
|-----------|--------------------------------|------------------------------------------------|-----------------------------|
| T         | 98 ± 1                         | -42 ± 3                                        | —                           |
| T@HP      | 100 ± 1                        | -16 ± 4                                        | —                           |
| T@BSA     | 99 ± 1                         | -35 ± 5                                        | —                           |
| T@BSA@HP  | 100 ± 1                        | -17 ± 5                                        | —                           |
| T@FBS     | 98 ± 2                         | -32 ± 4                                        | —                           |
| T@FBS@HP  | 100 ± 2                        | -18 ± 4                                        | —                           |
| T@BS      | 99 ± 2                         | -20 ± 4                                        | —                           |
| T@BS@HP   | 102 ± 3                        | -17 ± 3                                        | —                           |
| CS        | 106 ± 2                        | -37 ± 5                                        | —                           |
| CS@HP     | 109 ± 5                        | -16 ± 3                                        | —                           |
| CS@BSA    | 106 ± 3                        | -30 ± 4                                        | —                           |
| CS@BSA@HP | 109 ± 4                        | -16 ± 3                                        | —                           |
| CS@FBS    | 106 ± 3                        | -27 ± 5                                        | —                           |
| CS@FBS@HP | 108 ± 5                        | -17 ± 3                                        | —                           |
| CS@BS     | 104 ± 4                        | -18 ± 5                                        | —                           |
| CS@BS@HP  | 104 ± 6                        | -16 ± 2                                        | —                           |
| C         | 88 ± 2                         | -31 ± 5                                        | 47 ± 6                      |
| C@HP      | 93 ± 5                         | -16 ± 4                                        | —                           |
| C@BSA     | 85 ± 3                         | -29 ± 6                                        | —                           |
| C@BSA@HP  | 90 ± 4                         | -17 ± 4                                        | —                           |
| C@FBS     | 89 ± 2                         | -22 ± 4                                        | —                           |
| C@FBS@HP  | 93 ± 2                         | -16 ± 4                                        | —                           |
| C@BS      | 111 ± 7                        | -16 ± 4                                        | —                           |
| C@BS@HP   | 115 ± 4                        | -16 ± 4                                        | —                           |

<sup>a</sup> Determined by nanoparticle tracking analysis.

<sup>b</sup> Measured in 10 mM phosphate buffer (pH 7.4) by microelectrophoresis.

<sup>c</sup> Measured from the highest point on the nanoparticle and nanocapsule in dry state to the substrate surface by atomic force microscopy. Ten nanoparticles or nanocapsules were analyzed for each sample.

**Table S2.** Top 20 proteins identified in the bovine coronas of Au@BDT templates (T), Au@BDT@MPN core-shell nanoparticles (CS), and Au@MPN nanocapsules (C) precoated with BSA, FBS, or BS

| Protein ID | Protein name                                    | Gene name | Relative protein abundance (RPA) of top 20 proteins in the bovine coronas (%) |       |       |        |        |       |       |       |       |
|------------|-------------------------------------------------|-----------|-------------------------------------------------------------------------------|-------|-------|--------|--------|-------|-------|-------|-------|
|            |                                                 |           | T@BSA                                                                         | T@FBS | T@BS  | CS@BSA | CS@FBS | CS@BS | C@BSA | C@FBS | C@BS  |
| Q1RMN8     | Immunoglobulin light chain, lambda gene cluster | IGL@      | 0.05                                                                          | 0.03  | 20.30 | 0.14   | 0.03   | 7.86  | 0.08  | 0.04  | 8.81  |
| Q3ZBS7     | Vitronectin                                     | VTN       | 0.00                                                                          | 3.38  | 11.80 | 0.00   | 0.06   | 0.21  | 0.00  | 0.63  | 1.90  |
| P15497     | Apolipoprotein A-I                              | APOA1     | 0.03                                                                          | 4.29  | 10.26 | 0.03   | 13.45  | 27.54 | 0.00  | 0.62  | 2.29  |
| P00735     | Prothrombin                                     | F2        | 0.00                                                                          | 1.79  | 7.93  | 0.00   | 0.03   | 0.60  | 0.00  | 0.27  | 2.48  |
| Q03247     | Apolipoprotein E                                | APOE      | 0.02                                                                          | 1.74  | 7.37  | 0.09   | 0.34   | 4.90  | 0.00  | 1.02  | 2.30  |
| Q3T052     | Inter-alpha-trypsin inhibitor heavy chain H4    | ITIH4     | 0.02                                                                          | 1.19  | 6.15  | 0.00   | 0.27   | 3.47  | 0.70  | 0.35  | 1.48  |
| P41361     | Antithrombin-III                                | SERPINC1  | 0.00                                                                          | 1.72  | 5.91  | 0.09   | 0.08   | 0.61  | 0.01  | 0.31  | 2.77  |
| P81644     | Apolipoprotein A-II                             | APOA2     | 0.00                                                                          | 23.54 | 4.89  | 0.11   | 4.14   | 1.73  | 0.00  | 3.07  | 0.71  |
| Q2KJ62     | Kininogen-1                                     | KNG1      | 0.00                                                                          | 0.09  | 3.30  | 0.01   | 0.02   | 0.50  | 0.00  | 0.01  | 1.98  |
| Q3SX14     | Gelsolin                                        | GSN       | 0.11                                                                          | 1.40  | 3.27  | 1.59   | 2.56   | 16.23 | 2.85  | 3.29  | 18.04 |
| P02769     | Serum albumin                                   | ALB       | 94.96                                                                         | 0.63  | 2.44  | 93.40  | 1.20   | 1.99  | 95.55 | 2.34  | 15.00 |
| Q2UVX4     | Complement C3                                   | C3        | 0.11                                                                          | 0.31  | 1.66  | 0.20   | 0.45   | 3.03  | 0.17  | 3.37  | 4.59  |
| P01966     | Hemoglobin subunit alpha                        | HBA       | 0.15                                                                          | 25.97 | 1.64  | 0.07   | 23.62  | 2.06  | 0.02  | 20.56 | 2.33  |
| Q9N2I2     | Plasma serine protease inhibitor                | SERPINA5  | 0.00                                                                          | 1.45  | 1.49  | 0.00   | 1.11   | 1.72  | 0.00  | 1.22  | 0.95  |
| P02777     | Platelet factor 4                               | PF4       | 0.00                                                                          | 0.71  | 1.38  | 0.00   | 0.17   | 1.20  | 0.00  | 1.33  | 8.69  |
| P17690     | Beta-2-glycoprotein 1                           | APOH      | 0.05                                                                          | 0.29  | 0.69  | 0.06   | 0.71   | 1.07  | 0.04  | 1.35  | 0.38  |

|                                |                                 |                          |      |       |       |      |       |       |      |       |      |
|--------------------------------|---------------------------------|--------------------------|------|-------|-------|------|-------|-------|------|-------|------|
| Q3SX09                         | Hemoglobin fetal subunit beta   | N/A                      | 0.53 | 16.79 | 0.60  | 0.26 | 28.44 | 0.98  | 0.06 | 31.98 | 0.70 |
| P12763                         | Alpha-2-HS-glycoprotein         | AHSG                     | 0.05 | 9.79  | 0.11  | 0.09 | 14.84 | 0.15  | 0.02 | 12.72 | 0.91 |
| P34955                         | Alpha-1-antitrypsin             | SERPINA1                 | 0.01 | 1.10  | 0.11  | 0.05 | 1.11  | 0.13  | 0.00 | 0.82  | 0.40 |
| P02672                         | Fibrinogen alpha chain          | FGA                      | 0.00 | 0.39  | 0.08  | 0.00 | 0.90  | 0.95  | 0.00 | 0.59  | 0.58 |
| P15497, Q03247, P81644, P17690 | Apolipoproteins A-I, A-II, E, H | APOA1, APOA2, APOE, APOH | 0.1  | 29.86 | 23.21 | 0.29 | 18.64 | 35.24 | 0.04 | 6.06  | 5.68 |

**Table S3.** Top 20 proteins identified in the human plasma coronas of Au@BDT templates (T), Au@BDT@MPN core-shell nanoparticles (CS), and Au@MPN nanocapsules (C) without precoating and precoated with BSA, FBS, or BS

| Protein ID | Protein name                        | Gene name | Relative protein abundance (RPA) of top 20 proteins of the human plasma coronas (%) |       |       |       |       |        |        |       |       |       |       |       |
|------------|-------------------------------------|-----------|-------------------------------------------------------------------------------------|-------|-------|-------|-------|--------|--------|-------|-------|-------|-------|-------|
|            |                                     |           | T                                                                                   | T@BSA | T@FBS | T@BS  | CS    | CS@BSA | CS@FBS | CS@BS | C     | C@BSA | C@FBS | C@BS  |
| P02671     | Fibrinogen alpha chain              | FGA       | 18.94                                                                               | 6.89  | 0.45  | 0.27  | 25.65 | 11.80  | 17.95  | 14.80 | 24.55 | 3.81  | 8.96  | 3.36  |
| P02679     | Fibrinogen gamma chain              | FGG       | 14.53                                                                               | 6.49  | 0.38  | 0.32  | 20.94 | 10.82  | 16.13  | 12.48 | 21.07 | 3.23  | 7.11  | 2.04  |
| P02675     | Fibrinogen beta chain               | FGB       | 15.48                                                                               | 5.43  | 0.28  | 0.17  | 17.46 | 8.80   | 12.77  | 10.44 | 13.87 | 2.40  | 4.98  | 1.37  |
| P02768     | Serum albumin                       | ALB       | 1.78                                                                                | 7.13  | 1.23  | 2.37  | 1.15  | 7.22   | 1.18   | 0.69  | 8.45  | 32.48 | 4.74  | 16.24 |
| P04004     | Vitronectin                         | VTN       | 1.00                                                                                | 1.94  | 2.98  | 4.54  | 0.79  | 4.04   | 3.44   | 3.10  | 4.89  | 16.24 | 16.88 | 13.19 |
| P02654     | Apolipoprotein C-I                  | APOC1     | 1.16                                                                                | 0.16  | 0.12  | 0.18  | 0.55  | 0.08   | 0.11   | 0.11  | 3.53  | 8.92  | 2.75  | 1.47  |
| P0DOX5     | Ig gamma-1 chain C region           | IGHG1     | 7.69                                                                                | 13.01 | 14.55 | 17.04 | 6.04  | 10.47  | 8.50   | 9.03  | 1.99  | 0.98  | 0.44  | 0.46  |
| P0DOX7     | Immunoglobulin kappa light chain    | N/A       | 6.22                                                                                | 11.91 | 16.98 | 12.76 | 6.43  | 9.94   | 9.59   | 7.97  | 1.61  | 1.31  | 0.80  | 1.28  |
| P35542     | Serum amyloid A-4 protein           | SAA4      | 0.04                                                                                | 0.07  | 0.03  | 0.10  | 0.04  | 0.18   | 0.09   | 0.74  | 1.48  | 1.83  | 1.45  | 2.33  |
| P01042     | Kininogen-1                         | KNG1      | 0.46                                                                                | 0.38  | 1.09  | 0.40  | 0.18  | 1.72   | 0.75   | 3.24  | 1.33  | 3.69  | 4.81  | 14.92 |
| P0DOX8     | Immunoglobulin lambda-1 light chain | N/A       | 4.18                                                                                | 6.40  | 8.31  | 6.61  | 2.75  | 4.48   | 3.29   | 3.35  | 1.24  | 0.90  | 0.56  | 1.79  |

|        |                                       |       |      |       |       |       |      |       |      |      |      |      |      |      |
|--------|---------------------------------------|-------|------|-------|-------|-------|------|-------|------|------|------|------|------|------|
| P02775 | Platelet basic protein                | PPBP  | 0.22 | 0.16  | 0.03  | 0.00  | 0.91 | 0.44  | 0.95 | 0.58 | 1.12 | 1.39 | 1.17 | 2.09 |
| P02747 | Complement C1q subcomponent subunit C | C1QC  | 1.75 | 0.46  | 0.29  | 0.66  | 0.08 | 0.34  | 0.05 | 0.14 | 1.11 | 2.64 | 4.11 | 1.19 |
| P02652 | Apolipoprotein A-II                   | APOA2 | 0.53 | 0.15  | 0.20  | 0.27  | 0.38 | 0.08  | 0.13 | 0.23 | 1.06 | 0.62 | 0.57 | 1.06 |
| P01860 | Ig gamma-3 chain C region             | IGHG3 | 0.67 | 1.19  | 1.08  | 2.84  | 0.53 | 0.91  | 0.63 | 1.40 | 1.04 | 0.74 | 0.34 | 0.33 |
| P02656 | Apolipoprotein C-III                  | APOC3 | 2.27 | 0.15  | 2.07  | 7.41  | 0.27 | 0.04  | 0.28 | 3.25 | 0.97 | 0.43 | 0.45 | 0.83 |
| P01834 | Ig kappa chain C region               | IGKC  | 5.02 | 10.47 | 14.09 | 11.41 | 4.53 | 10.04 | 8.07 | 8.91 | 0.90 | 0.54 | 0.42 | 0.36 |
| Q03591 | Complement factor H-related protein 1 | CFHR1 | 0.11 | 0.12  | 0.01  | 0.02  | 0.19 | 0.41  | 0.35 | 0.36 | 0.89 | 1.35 | 0.92 | 1.54 |
| P02746 | Complement C1q subcomponent subunit B | C1QB  | 1.08 | 0.31  | 0.28  | 0.88  | 0.07 | 0.37  | 0.06 | 0.09 | 0.83 | 2.74 | 3.90 | 1.36 |
| P02647 | Apolipoprotein A-I                    | APOA1 | 0.57 | 0.25  | 0.43  | 0.40  | 1.03 | 0.19  | 0.23 | 0.23 | 0.69 | 0.32 | 0.24 | 1.13 |



**Table S4.** Top 20 bovine proteins in FBS and BS and top 20 proteins in human plasma

| RPA of the top 20 bovine proteins (%) |                               |            |       |       | RPA of the top 20 human proteins (%) |                                     |           |              |
|---------------------------------------|-------------------------------|------------|-------|-------|--------------------------------------|-------------------------------------|-----------|--------------|
| Protein ID                            | Protein name                  | Gene name  | FBS   | BS    | Protein ID                           | Protein name                        | Gene name | Human plasma |
| P02769                                | Serum albumin                 | ALB        | 33.06 | 38.61 | P02768                               | Serum albumin                       | ALB       | 42.54        |
| P12763                                | Alpha-2-HS-glycoprotein       | AHSG       | 25.34 | 0.98  | P02652                               | Apolipoprotein A-II                 | APOA2     | 7.20         |
| P34955                                | Alpha-1-antiproteinase        | SERPINA1   | 11.02 | 1.82  | P02787                               | Serotransferrin                     | TF        | 3.60         |
| Q0IIK2                                | Serotransferrin               | TF         | 5.99  | 4.67  | P0DOX5                               | Ig gamma-1 chain C region           | IGHG1     | 3.36         |
| Q3SX09                                | Hemoglobin fetal subunit beta | N/A        | 4.65  | 1.50  | P02647                               | Apolipoprotein A-I                  | APOA1     | 2.99         |
| Q3SZR3                                | Alpha-1-acid glycoprotein     | ORM1       | 3.60  | 7.68  | P0DOX7                               | Immunoglobulin kappa light chain    | N/A       | 4.54         |
| P15497                                | Apolipoprotein A-I            | APOA1      | 3.22  | 13.39 | P0DOX8                               | Immunoglobulin lambda-1 light chain | N/A       | 2.61         |
| Q58D62                                | Fetuin-B                      | FETUB      | 2.13  | 0.05  | P01009                               | Alpha-1-antitrypsin                 | SERPINA1  | 2.21         |
| P81644                                | Apolipoprotein A-II           | APOA2      | 1.84  | 2.43  | P00738                               | Haptoglobin                         | HP        | 1.98         |
| Q3SZ57                                | Alpha-fetoprotein             | AFP        | 1.57  | 0.00  | P01859                               | Ig gamma-2 chain C region           | IGHG2     | 1.72         |
| P01966                                | Hemoglobin subunit alpha      | HBA        | 1.40  | 1.11  | P02679                               | Fibrinogen gamma chain              | FGG       | 1.78         |
| Q9TTE1                                | Serpin A3-1                   | SERPINA3-1 | 1.14  | 4.48  | P02675                               | Fibrinogen beta chain               | FGB       | 1.81         |

|        |                                                     |          |      |      |        |                           |       |      |
|--------|-----------------------------------------------------|----------|------|------|--------|---------------------------|-------|------|
| Q2KJF1 | Alpha-1B-glycoprotein                               | A1BG     | 1.06 | 1.10 | P01834 | Ig kappa chain C region   | IGKC  | 1.56 |
| P28800 | Alpha-2-antiplasmin                                 | SERPINF2 | 0.36 | 0.11 | P02671 | Fibrinogen alpha chain    | FGA   | 1.55 |
| Q9TRI1 | Inter-alpha-trypsin inhibitor HC2 component homolog | N/A      | 0.28 | 0.10 | P01860 | Ig gamma-3 chain C region | IGHG3 | 1.41 |
| Q3T052 | Inter-alpha-trypsin inhibitor heavy chain H4        | ITIH4    | 0.25 | 1.96 | P01023 | Alpha-2-macroglobulin     | A2M   | 1.16 |
| Q3MHN5 | Vitamin D-binding protein                           | GC       | 0.23 | 0.17 | P01871 | Ig mu chain C region      | IGHM  | 1.13 |
| Q3SZH5 | Angiotensinogen                                     | AGT      | 0.23 | 0.10 | P01876 | Ig alpha-1 chain C region | IGHA1 | 1.10 |
| P17690 | Beta-2-glycoprotein 1                               | APOH     | 0.22 | 0.22 | P01024 | Complement C3             | C3    | 0.92 |
| P00978 | Protein AMBP                                        | AMBP     | 0.21 | 0.14 | P02790 | Hemopexin                 | HPX   | 0.84 |

**Table S5.** Enrichment indexes of the human plasma corona proteins of the Au@BDT templates (T), Au@BDT@MPN core–shell nanoparticles (CS), and Au@MPN nanocapsules (C) without precoating and precoated with BSA, FBS, or BS (the enrichment indexes for the different nanoparticle systems are listed according to the enrichment indexes of the T nanoparticles sorted from largest to smallest)

| Protein ID | Protein name                          | Gene name | Function        | Enrichment index of the human plasma corona proteins |         |         |         |         |         |         |         |        |         |         |         |
|------------|---------------------------------------|-----------|-----------------|------------------------------------------------------|---------|---------|---------|---------|---------|---------|---------|--------|---------|---------|---------|
|            |                                       |           |                 | T                                                    | T@BSA   | T@FBS   | T@BS    | CS      | CS@BSA  | CS@FBS  | CS@BS   | C      | C@BSA   | C@FBS   | C@BS    |
| P0DOY2     | Immunoglobulin lambda constant 2      | IGLC2     | immunoglobulins | 2867.18                                              | 4193.00 | 7416.84 | 4807.41 | 1543.48 | 3445.98 | 2248.70 | 2369.32 | 0.99   | 1.00    | 1.07    | 1.01    |
| P0DJI8     | Serum amyloid A-1 protein             | SAA1      | acute phase     | 2579.96                                              | 818.98  | 1799.55 | 780.96  | 737.05  | 677.68  | 1337.76 | 545.23  | 68.63  | 121.25  | 113.81  | 248.03  |
| P02745     | Complement C1q subcomponent subunit A | C1QA      | complement      | 2142.64                                              | 670.35  | 637.14  | 1461.79 | 132.27  | 756.62  | 76.33   | 277.79  | 860.57 | 3245.91 | 4058.18 | 1408.54 |
| A0A0C4DH67 | Immunoglobulin kappa variable 1-8     | IGKV1-8   | immunoglobulins | 742.25                                               | 1233.54 | 1318.04 | 697.37  | 519.63  | 846.06  | 842.67  | 623.48  | 0.99   | 1.00    | 1.07    | 1.01    |
| P06310     | Immunoglobulin kappa variable 2-30    | IGKV2D-30 | immunoglobulins | 681.95                                               | 2077.28 | 3497.60 | 3295.60 | 689.73  | 1181.20 | 1084.70 | 1597.77 | 0.99   | 1.00    | 1.07    | 1.01    |

|                |                                       |          |                 |        |         |         |         |        |         |         |        |         |         |         |         |
|----------------|---------------------------------------|----------|-----------------|--------|---------|---------|---------|--------|---------|---------|--------|---------|---------|---------|---------|
| A0A0C4<br>DH72 | Immunoglobulin kappa variable 1-6     | IGKV1-6  | immunoglobulins | 659.96 | 1344.58 | 1452.72 | 1449.06 | 712.08 | 1128.41 | 852.34  | 989.35 | 0.99    | 1.00    | 1.07    | 1.01    |
| A0A075<br>B6K4 | Immunoglobulin lambda variable 3-10   | IGLV3-10 | immunoglobulins | 621.21 | 1189.81 | 1961.82 | 434.15  | 0.99   | 1341.59 | 1074.34 | 315.20 | 0.99    | 1.00    | 1.07    | 1.01    |
| P61626         | Lysozyme C                            | LYZ      | others          | 494.68 | 359.06  | 542.35  | 435.28  | 301.21 | 274.78  | 286.95  | 361.23 | 907.29  | 968.76  | 4112.75 | 3979.90 |
| P15169         | Carboxypeptidase N catalytic chain    | CPN1     | others          | 341.41 | 98.21   | 165.31  | 171.54  | 326.67 | 538.66  | 507.57  | 977.46 | 830.35  | 3123.96 | 5082.75 | 8442.91 |
| Q03591         | Complement factor H-related protein 1 | CFHR1    | complement      | 287.12 | 309.01  | 25.68   | 65.88   | 503.56 | 1097.38 | 949.73  | 968.87 | 2368.61 | 3636.63 | 2644.55 | 4208.02 |
| P01599         | Immunoglobulin kappa variable 1-17    | IGKV1-17 | immunoglobulins | 272.25 | 656.90  | 797.29  | 174.07  | 231.10 | 288.81  | 132.53  | 1.01   | 0.99    | 1.00    | 1.07    | 1.01    |
| P80748         | Immunoglobulin lambda variable 3-21   | IGLV3-21 | immunoglobulins | 237.49 | 397.57  | 667.89  | 520.64  | 184.40 | 364.47  | 263.27  | 237.94 | 0.99    | 1.00    | 1.07    | 1.01    |

|                |                                      |           |                 |        |        |        |        |         |        |        |         |         |         |        |        |
|----------------|--------------------------------------|-----------|-----------------|--------|--------|--------|--------|---------|--------|--------|---------|---------|---------|--------|--------|
| A0A075<br>B6S2 | Immunoglobulin kappa variable 2D-29  | IGKV2D-29 | immunoglobulins | 207.23 | 563.56 | 542.83 | 647.00 | 0.99    | 445.73 | 188.20 | 378.02  | 0.99    | 1.00    | 1.07   | 1.01   |
| PODP08         | Immunoglobulin heavy variable 4-38-2 | IGHV4-61  | immunoglobulins | 198.39 | 501.41 | 489.67 | 894.93 | 191.46  | 350.66 | 246.53 | 232.29  | 0.99    | 1.00    | 1.07   | 1.01   |
| A0A0C4<br>DH38 | Immunoglobulin heavy variable 5-51   | IGHV5-51  | immunoglobulins | 157.70 | 171.25 | 198.88 | 224.92 | 103.09  | 229.20 | 149.83 | 175.67  | 0.99    | 1.00    | 1.07   | 1.01   |
| P01714         | Immunoglobulin lambda variable 3-19  | IGLV3-19  | immunoglobulins | 142.34 | 464.48 | 508.23 | 163.54 | 100.42  | 372.92 | 181.82 | 26.94   | 0.99    | 1.00    | 1.07   | 1.01   |
| P06396         | Gelsolin                             | GSN       | tissue leakage  | 124.17 | 0.99   | 19.73  | 1.00   | 1342.94 | 421.35 | 272.36 | 1006.53 | 1612.52 | 1708.85 | 431.67 | 404.13 |
| A0A0B4J<br>1U7 | Immunoglobulin heavy variable 6-1    | IGHV6-1   | immunoglobulins | 115.36 | 265.21 | 385.18 | 271.88 | 96.67   | 196.92 | 128.24 | 131.26  | 0.99    | 1.00    | 1.07   | 1.01   |
| P01743         | Immunoglobulin heavy                 | IGHV1-46  | immunoglobulins | 113.71 | 153.13 | 108.73 | 291.04 | 0.99    | 128.36 | 104.49 | 84.58   | 0.99    | 1.00    | 1.07   | 1.01   |

|            |                                              |          |                 |        |        |        |        |        |        |        |         |         |         |         |         |  |
|------------|----------------------------------------------|----------|-----------------|--------|--------|--------|--------|--------|--------|--------|---------|---------|---------|---------|---------|--|
|            | variable 1-46                                |          |                 |        |        |        |        |        |        |        |         |         |         |         |         |  |
| A0A0C4DH68 | Immunoglobulin kappa variable 2-24           | IGKV2-24 | immunoglobulins | 113.05 | 327.83 | 359.45 | 1.00   | 88.91  | 332.52 | 170.79 | 1.01    | 0.99    | 1.00    | 1.07    | 1.01    |  |
| Q14520     | Hyaluronan-binding protein 2                 | HABP2    | coagulation     | 112.06 | 0.99   | 1.01   | 1.00   | 0.99   | 0.99   | 1.01   | 1.01    | 0.99    | 1.00    | 1.07    | 55.22   |  |
| A0A0A0MS15 | Immunoglobulin heavy variable 3-49           | IGHV3-49 | immunoglobulins | 109.73 | 261.71 | 159.95 | 189.57 | 83.77  | 238.18 | 101.73 | 143.41  | 0.99    | 1.00    | 1.07    | 1.01    |  |
| P35542     | Serum amyloid A-4 protein                    | SAA4     | acute phase     | 95.37  | 179.68 | 70.51  | 274.94 | 112.69 | 480.94 | 250.66 | 1992.37 | 3945.23 | 4926.36 | 4174.85 | 6341.17 |  |
| Q14624     | Inter-alpha-trypsin inhibitor heavy chain H4 | ITIH4    | acute phase     | 80.48  | 150.09 | 113.74 | 124.14 | 18.40  | 32.01  | 18.53  | 36.13   | 22.89   | 72.34   | 41.40   | 42.38   |  |
| P00746     | Complement factor D                          | CFD      | complement      | 78.26  | 50.05  | 29.02  | 1.00   | 263.86 | 322.73 | 343.60 | 860.78  | 30.17   | 71.76   | 211.89  | 1.01    |  |

|            |                                       |          |                 |       |         |         |         |        |        |        |        |       |        |        |       |
|------------|---------------------------------------|----------|-----------------|-------|---------|---------|---------|--------|--------|--------|--------|-------|--------|--------|-------|
| P0DJ19     | Serum amyloid A-2 protein             | SAA2     | others          | 74.42 | 89.09   | 123.05  | 73.19   | 0.99   | 0.99   | 124.43 | 65.65  | 0.99  | 1.00   | 1.07   | 1.01  |
| P18428     | Lipopolysaccharide-binding protein    | LBP      | acute phase     | 73.70 | 102.90  | 46.79   | 41.49   | 0.99   | 0.99   | 560.43 | 1.01   | 0.99  | 1.00   | 1.07   | 1.01  |
| A0A075B6K0 | Immunoglobulin lambda variable 3-16   | IGLV3-16 | immunoglobulins | 73.30 | 203.21  | 208.01  | 239.58  | 34.40  | 147.30 | 119.26 | 125.04 | 0.99  | 1.00   | 1.07   | 1.01  |
| P02743     | Serum amyloid P-component             | APCS     | acute phase     | 70.25 | 1334.92 | 1368.38 | 4842.16 | 125.49 | 57.07  | 1.01   | 1.01   | 0.99  | 1.00   | 1.07   | 1.01  |
| P04430     | Immunoglobulin kappa variable 1-16    | IGKV1-16 | immunoglobulins | 63.83 | 229.92  | 241.34  | 422.68  | 0.99   | 91.59  | 55.49  | 61.52  | 0.99  | 1.00   | 1.07   | 1.01  |
| P27918     | Properdin                             | CFP      | others          | 62.17 | 25.10   | 1.01    | 123.81  | 0.99   | 0.99   | 1.01   | 31.17  | 0.99  | 428.16 | 406.71 | 98.21 |
| P02746     | Complement C1q subcomponent subunit B | C1QB     | complement      | 59.40 | 17.05   | 15.67   | 48.72   | 4.11   | 20.54  | 3.14   | 4.83   | 45.92 | 151.72 | 232.16 | 76.51 |

|            |                                       |            |                 |       |        |        |        |       |        |        |        |       |        |       |       |
|------------|---------------------------------------|------------|-----------------|-------|--------|--------|--------|-------|--------|--------|--------|-------|--------|-------|-------|
| P0DP03     | Immunoglobulin heavy variable 3-30-5  | IGHV3-30-5 | immunoglobulins | 54.47 | 81.96  | 46.18  | 1.00   | 0.99  | 43.08  | 1.01   | 1.01   | 0.99  | 1.00   | 1.07  | 1.01  |
| P00736     | Complement C1r subcomponent           | C1R        | complement      | 48.83 | 235.82 | 233.59 | 473.12 | 0.99  | 0.99   | 1.01   | 40.16  | 25.93 | 233.70 | 35.05 | 56.35 |
| P0DOX6     | Immunoglobulin mu heavy chain         | N/A        | immunoglobulins | 45.07 | 108.13 | 105.76 | 59.93  | 30.15 | 59.04  | 51.83  | 28.42  | 0.99  | 1.00   | 1.07  | 1.01  |
| A0A0G2JS06 | Immunoglobulin lambda variable 5-39   | IGLV5-39   | immunoglobulins | 39.71 | 141.39 | 119.21 | 43.29  | 43.57 | 62.69  | 39.25  | 25.64  | 0.99  | 1.00   | 1.07  | 1.01  |
| P02747     | Complement C1q subcomponent subunit C | C1QC       | complement      | 38.98 | 10.31  | 6.53   | 14.86  | 1.78  | 7.55   | 1.14   | 3.07   | 24.77 | 58.94  | 98.66 | 27.04 |
| A0A087WSY4 | Immunoglobulin heavy variable 4-30-2  | IGHV4-30-2 | immunoglobulins | 37.73 | 0.99   | 76.32  | 69.19  | 32.82 | 75.81  | 61.11  | 35.60  | 0.99  | 1.00   | 1.07  | 1.01  |
| P01780     | Immunoglobulin heavy                  | IGHV3-7    | immunoglobulins | 36.90 | 93.33  | 208.00 | 171.22 | 0.99  | 216.23 | 120.44 | 122.99 | 0.99  | 1.00   | 1.07  | 1.01  |



|        |                                              |         |                 |       |        |        |        |        |        |        |        |        |         |         |         |
|--------|----------------------------------------------|---------|-----------------|-------|--------|--------|--------|--------|--------|--------|--------|--------|---------|---------|---------|
|        | variable 3-7                                 |         |                 |       |        |        |        |        |        |        |        |        |         |         |         |
| P17936 | Insulin-like growth factor-binding protein 3 | IGFBP3  | others          | 35.90 | 0.99   | 36.48  | 1.00   | 111.51 | 249.19 | 249.14 | 357.27 | 226.00 | 542.89  | 720.95  | 864.86  |
| P22692 | Insulin-like growth factor-binding protein 4 | IGFBP4  | others          | 31.60 | 24.04  | 245.70 | 265.25 | 31.55  | 46.12  | 187.23 | 255.62 | 0.99   | 27.16   | 1.07    | 603.26  |
| P02671 | Fibrinogen alpha chain                       | FGA     | coagulation     | 29.73 | 10.82  | 0.72   | 0.43   | 40.20  | 18.50  | 28.53  | 23.54  | 38.54  | 6.02    | 15.18   | 5.37    |
| P02675 | Fibrinogen beta chain                        | FGB     | coagulation     | 28.00 | 9.82   | 0.52   | 0.31   | 31.53  | 15.90  | 23.39  | 19.12  | 25.08  | 4.37    | 9.72    | 2.53    |
| P55056 | Apolipoprotein C-IV                          | APOC4   | apolipoproteins | 27.04 | 101.75 | 54.85  | 54.00  | 0.99   | 44.12  | 30.91  | 41.38  | 420.21 | 1980.12 | 3733.19 | 3362.79 |
| P02679 | Fibrinogen gamma chain                       | FGG     | coagulation     | 20.62 | 9.22   | 0.54   | 0.45   | 29.68  | 15.34  | 23.18  | 17.95  | 29.91  | 4.62    | 10.89   | 2.95    |
| P01700 | Immunoglobulin lambda                        | IGKV1-6 | immunoglobulins | 14.08 | 23.83  | 33.64  | 19.25  | 7.89   | 17.98  | 14.63  | 9.47   | 0.02   | 0.02    | 0.02    | 0.55    |

|        |                                 |       |                 |      |       |       |       |      |       |       |       |       |        |        |        |
|--------|---------------------------------|-------|-----------------|------|-------|-------|-------|------|-------|-------|-------|-------|--------|--------|--------|
|        | variable 1-47                   |       |                 |      |       |       |       |      |       |       |       |       |        |        |        |
| P04004 | Vitronectin                     | VTN   | tissue leakage  | 8.82 | 17.06 | 26.64 | 40.14 | 6.96 | 35.42 | 30.58 | 27.55 | 42.94 | 143.50 | 160.00 | 118.09 |
| P02654 | Apolipoprotein C-I              | APOC1 | apolipoproteins | 5.70 | 0.80  | 0.61  | 0.90  | 2.69 | 0.37  | 0.53  | 0.55  | 17.37 | 44.17  | 14.62  | 7.37   |
| P02656 | Apolipoprotein C-III            | APOC3 | apolipoproteins | 4.16 | 0.28  | 3.86  | 13.65 | 0.49 | 0.07  | 0.52  | 6.03  | 1.77  | 0.78   | 0.90   | 1.56   |
| P01042 | Kininogen-1                     | KNG1  | coagulation     | 3.96 | 3.24  | 9.45  | 3.46  | 1.51 | 14.61 | 6.45  | 27.95 | 11.33 | 31.65  | 44.23  | 129.70 |
| P01591 | Immunoglobulin J chain          | IGJ   | immunoglobulins | 3.60 | 6.43  | 4.95  | 3.46  | 0.64 | 0.88  | 0.86  | 0.55  | 0.01  | 0.01   | 2.08   | 1.94   |
| P01834 | Ig kappa chain C region         | IGKC  | immunoglobulins | 3.54 | 7.38  | 10.11 | 8.09  | 3.19 | 7.07  | 5.76  | 6.35  | 0.63  | 0.38   | 0.32   | 0.25   |
| P04003 | C4b-binding protein alpha chain | C4BPA | complement      | 3.46 | 0.61  | 0.71  | 0.01  | 0.54 | 0.01  | 0.01  | 0.01  | 3.96  | 0.58   | 0.50   | 0.30   |

|            |                                    |          |                 |      |      |       |      |       |       |       |       |       |       |       |       |
|------------|------------------------------------|----------|-----------------|------|------|-------|------|-------|-------|-------|-------|-------|-------|-------|-------|
| P04196     | Histidine-rich glycoprotein        | HRG      | coagulation     | 3.07 | 5.66 | 39.25 | 5.74 | 2.89  | 4.37  | 2.47  | 1.37  | 3.99  | 8.47  | 23.52 | 18.65 |
| P0DOX2     | Immunoglobulin alpha-2 heavy chain | N/A      | immunoglobulins | 2.75 | 5.52 | 4.99  | 8.82 | 1.82  | 2.66  | 1.95  | 2.79  | 6.16  | 5.04  | 2.58  | 2.22  |
| O43866     | CD5 antigen-like                   | CD5L     | tissue leakage  | 2.37 | 4.21 | 2.68  | 2.55 | 0.01  | 0.58  | 0.01  | 0.01  | 0.01  | 1.71  | 0.54  | 0.96  |
| P00748     | Coagulation factor XII             | F12      | coagulation     | 2.23 | 0.03 | 0.03  | 0.03 | 14.48 | 21.90 | 5.77  | 5.69  | 8.12  | 16.77 | 2.00  | 0.75  |
| P08603     | Complement factor H                | CFH      | complement      | 2.18 | 0.95 | 0.39  | 1.22 | 0.01  | 0.59  | 0.01  | 0.66  | 2.15  | 7.39  | 10.75 | 9.77  |
| P02775     | Platelet basic protein             | PPBP     | acute phase     | 2.09 | 1.50 | 0.28  | 0.00 | 8.60  | 4.17  | 9.18  | 5.58  | 10.62 | 13.32 | 11.98 | 20.25 |
| A0A0B4J1X5 | Immunoglobulin heavy variable 3-74 | IGHV3-74 | immunoglobulins | 2.08 | 4.08 | 4.50  | 4.66 | 53.63 | 11.21 | 38.01 | 15.41 | 0.02  | 0.02  | 0.02  | 0.02  |
| P10909     | Clusterin                          | CLU      | apolipoproteins | 2.06 | 3.49 | 2.80  | 1.03 | 0.42  | 0.26  | 0.20  | 0.25  | 1.74  | 0.83  | 0.70  | 0.25  |

|        |                                     |          |                 |      |      |      |       |      |      |      |      |      |      |      |      |
|--------|-------------------------------------|----------|-----------------|------|------|------|-------|------|------|------|------|------|------|------|------|
| P01871 | Ig mu chain C region                | IGHM     | immunoglobulins | 1.98 | 3.71 | 2.34 | 2.16  | 0.39 | 0.49 | 0.36 | 0.32 | 0.45 | 0.63 | 0.85 | 0.44 |
| P01701 | Immunoglobulin lambda variable 1-51 | IGLV1-51 | immunoglobulins | 1.93 | 3.96 | 2.61 | 5.91  | 1.54 | 2.86 | 2.40 | 3.14 | 0.00 | 0.00 | 0.00 | 0.00 |
| P00747 | Plasminogen                         | PLG      | coagulation     | 1.92 | 0.94 | 1.07 | 0.90  | 2.73 | 0.36 | 0.36 | 0.40 | 7.21 | 0.67 | 0.51 | 0.33 |
| P01602 | Immunoglobulin kappa variable 1-5   | IGKV1-5  | immunoglobulins | 1.65 | 5.83 | 3.23 | 10.77 | 0.01 | 0.44 | 0.01 | 0.01 | 0.01 | 0.01 | 0.01 | 0.01 |
| P0DOX8 | Immunoglobulin lambda-1 light chain | N/A      | immunoglobulins | 1.41 | 2.16 | 2.85 | 2.24  | 0.93 | 1.51 | 1.12 | 1.14 | 0.42 | 0.31 | 0.20 | 0.62 |
| P0DOX7 | Immunoglobulin kappa light chain    | N/A      | immunoglobulins | 1.28 | 2.45 | 3.56 | 2.64  | 1.32 | 2.04 | 2.00 | 1.66 | 0.33 | 0.27 | 0.18 | 0.27 |
| P01624 | Ig kappa chain V-III region POM     | IGKV3D-7 | immunoglobulins | 1.27 | 2.43 | 3.12 | 3.58  | 0.75 | 1.97 | 1.54 | 2.31 | 0.21 | 0.14 | 0.06 | 0.07 |

|            |                                     |           |                 |      |       |        |        |      |       |        |       |       |        |        |        |
|------------|-------------------------------------|-----------|-----------------|------|-------|--------|--------|------|-------|--------|-------|-------|--------|--------|--------|
| P01619     | Immunoglobulin kappa variable 3-20  | IGKV3-20  | immunoglobulins | 1.22 | 2.46  | 2.72   | 2.06   | 0.80 | 1.98  | 1.18   | 1.36  | 0.18  | 0.03   | 0.08   | 0.00   |
| A0A0A0MRZ8 | Immunoglobulin kappa variable 3D-11 | IGKV3D-11 | immunoglobulins | 1.16 | 2.22  | 3.77   | 3.71   | 0.69 | 1.86  | 2.56   | 3.31  | 0.00  | 0.29   | 0.00   | 0.00   |
| P0DOX5     | Ig gamma-1 chain C region           | IGHG1     | immunoglobulins | 1.11 | 1.88  | 2.15   | 2.48   | 0.87 | 1.51  | 1.25   | 1.32  | 0.29  | 0.14   | 0.07   | 0.07   |
| P06312     | Ig kappa chain V-IV region          | IGKV4-1   | immunoglobulins | 1.02 | 2.85  | 2.67   | 2.09   | 0.64 | 2.10  | 0.68   | 0.83  | 0.10  | 0.00   | 0.16   | 0.00   |
| P00739     | Haptoglobin-related protein         | HPR       | acute phase     | 0.99 | 59.53 | 1.01   | 1.00   | 0.99 | 0.99  | 1.01   | 1.01  | 0.99  | 1.00   | 1.07   | 1.01   |
| P23142     | Fibulin-1                           | FBLN1     | coagulation     | 0.99 | 0.99  | 99.34  | 1.00   | 0.99 | 0.99  | 97.76  | 1.01  | 0.99  | 1.00   | 1.07   | 1.01   |
| P03952     | Plasma kallikrein                   | KLKB1     | coagulation     | 0.99 | 0.99  | 71.17  | 141.58 | 0.99 | 69.58 | 1.01   | 79.31 | 73.01 | 323.14 | 445.52 | 944.42 |
| Q9BXJ4     | Complement C1q tumor necrosis       | C1QTNF3   | complement      | 0.99 | 0.99  | 106.39 | 1.00   | 0.99 | 0.99  | 157.15 | 60.04 | 0.99  | 1.00   | 233.95 | 1.01   |

|            |                                      |          |                 |      |        |       |       |      |         |       |       |       |        |        |      |
|------------|--------------------------------------|----------|-----------------|------|--------|-------|-------|------|---------|-------|-------|-------|--------|--------|------|
|            | factor-related protein 3             |          |                 |      |        |       |       |      |         |       |       |       |        |        |      |
| P07360     | Complement component C8 gamma chain  | C8G      | complement      | 0.99 | 0.99   | 1.01  | 86.30 | 0.99 | 0.99    | 1.01  | 74.45 | 0.99  | 1.00   | 1.07   | 1.01 |
| P02748     | Complement component C9              | C9       | complement      | 0.99 | 48.63  | 1.01  | 1.00  | 0.99 | 0.99    | 1.01  | 1.01  | 0.99  | 1.00   | 1.07   | 1.01 |
| A2NJV5     | Ig kappa chain V-II region RPMI 6410 | IGKV A18 | immunoglobulins | 0.99 | 0.99   | 1.01  | 1.00  | 0.99 | 0.99    | 1.01  | 1.01  | 86.49 | 189.03 | 137.23 | 1.01 |
| A0M8Q6     | Ig lambda-7 chain C region           | IGLC7    | immunoglobulins | 0.99 | 322.62 | 37.18 | 1.00  | 0.99 | 1064.04 | 36.06 | 1.01  | 0.99  | 1.00   | 1.07   | 1.01 |
| P0DOX3     | Immunoglobulin delta heavy chain     | IGHD     | immunoglobulins | 0.99 | 75.01  | 51.81 | 1.00  | 0.99 | 30.50   | 1.01  | 1.01  | 0.99  | 1.00   | 1.07   | 1.01 |
| A0A0B4J1Y9 | Immunoglobulin heavy variable 3-72   | IGHV3-72 | immunoglobulins | 0.99 | 0.99   | 1.01  | 46.40 | 0.99 | 0.99    | 1.01  | 1.01  | 0.99  | 1.00   | 1.07   | 1.01 |

|            |                                     |           |                 |      |        |        |        |       |        |       |       |      |      |      |      |
|------------|-------------------------------------|-----------|-----------------|------|--------|--------|--------|-------|--------|-------|-------|------|------|------|------|
| P04432     | Immunoglobulin kappa variable 1D-39 | IGKV1D-39 | immunoglobulins | 0.99 | 279.96 | 159.14 | 224.02 | 0.99  | 0.99   | 1.01  | 1.01  | 0.99 | 1.00 | 1.07 | 1.01 |
| A0A0C4DH24 | Immunoglobulin kappa variable 6-21  | IGKV6-21  | immunoglobulins | 0.99 | 43.94  | 54.47  | 1.00   | 0.99  | 0.99   | 1.01  | 1.01  | 0.99 | 1.00 | 1.07 | 1.01 |
| A0A0A0MT36 | Immunoglobulin kappa variable 6D-21 | IGKV6D-21 | immunoglobulins | 0.99 | 69.11  | 36.98  | 29.03  | 0.99  | 63.35  | 1.01  | 1.01  | 0.99 | 1.00 | 1.07 | 1.01 |
| P01703     | Immunoglobulin lambda variable 1-40 | IGLV1-40  | immunoglobulins | 0.99 | 0.99   | 157.16 | 126.55 | 59.49 | 107.14 | 81.70 | 84.38 | 0.99 | 1.00 | 1.07 | 1.01 |
| A0A075B6K5 | Immunoglobulin lambda variable 3-9  | IGLV3-9   | immunoglobulins | 0.99 | 32.83  | 35.04  | 1.00   | 0.99  | 34.13  | 1.01  | 1.01  | 0.99 | 1.00 | 1.07 | 1.01 |
| A0A075B6I9 | Immunoglobulin lambda variable 7-46 | IGLV7-46  | immunoglobulins | 0.99 | 147.81 | 154.60 | 87.68  | 51.04 | 118.53 | 54.17 | 54.95 | 0.99 | 1.00 | 1.07 | 1.01 |

|            |                                                            |          |                 |      |       |       |       |      |       |        |        |      |      |        |       |
|------------|------------------------------------------------------------|----------|-----------------|------|-------|-------|-------|------|-------|--------|--------|------|------|--------|-------|
| A0A0C4DH36 | Probable non-functional immunoglobulin heavy variable 3-38 | IGHV3-38 | immunoglobulins | 0.99 | 60.64 | 52.31 | 1.00  | 0.99 | 51.94 | 41.08  | 1.01   | 0.99 | 1.00 | 1.07   | 1.01  |
| Q6UY14     | ADAMTS-like protein 4                                      | ADAMTSL4 | others          | 0.99 | 0.99  | 51.43 | 1.00  | 0.99 | 0.99  | 1.01   | 1.01   | 0.99 | 1.00 | 1.07   | 1.01  |
| P49747     | Cartilage oligomeric matrix protein                        | COMP     | others          | 0.99 | 0.99  | 42.06 | 1.00  | 0.99 | 0.99  | 158.88 | 40.91  | 0.99 | 1.00 | 1.07   | 1.01  |
| P12109     | Collagen alpha-1(VI) chain                                 | COL6A1   | others          | 0.99 | 0.99  | 33.64 | 1.00  | 0.99 | 0.99  | 112.19 | 1.01   | 0.99 | 1.00 | 111.51 | 1.01  |
| P22352     | Glutathione peroxidase 3                                   | GPX3     | others          | 0.99 | 0.99  | 1.01  | 73.31 | 0.99 | 0.99  | 1.01   | 146.10 | 0.99 | 1.00 | 1.07   | 1.01  |
| P0DMV8     | Heat shock 70 kDa protein 1A                               | HSPA1A   | others          | 0.99 | 0.99  | 29.52 | 1.00  | 0.99 | 0.99  | 1.01   | 1.01   | 0.99 | 1.00 | 1.07   | 1.01  |
| Q04756     | Hepatocyte growth factor activator                         | HGFAC    | others          | 0.99 | 0.99  | 16.72 | 50.85 | 0.99 | 0.99  | 1.01   | 186.32 | 0.99 | 1.00 | 129.90 | 51.49 |



|        |                                              |          |        |      |       |        |        |        |        |        |         |       |        |        |         |
|--------|----------------------------------------------|----------|--------|------|-------|--------|--------|--------|--------|--------|---------|-------|--------|--------|---------|
| P01344 | Insulin-like growth factor II                | IGF2     | others | 0.99 | 0.99  | 58.36  | 115.32 | 0.99   | 0.99   | 1.01   | 1.01    | 77.70 | 51.73  | 787.47 | 998.65  |
| P18065 | Insulin-like growth factor-binding protein 2 | IGFBP2   | others | 0.99 | 0.99  | 392.22 | 332.18 | 0.99   | 0.99   | 89.89  | 395.95  | 58.43 | 55.99  | 725.77 | 2497.85 |
| P20774 | Mimecan                                      | OGN      | others | 0.99 | 0.99  | 41.89  | 1.00   | 0.99   | 0.99   | 1.01   | 1.01    | 0.99  | 1.00   | 1.07   | 1.01    |
| P59666 | Neutrophil defensin 3                        | DEFA3    | others | 0.99 | 56.24 | 60.80  | 1.00   | 0.99   | 0.99   | 1.01   | 1.01    | 0.99  | 1.00   | 1.07   | 1.01    |
| P62937 | Peptidyl-prolyl cis-trans isomerase A        | PPIA     | others | 0.99 | 0.99  | 230.16 | 39.43  | 0.99   | 0.99   | 176.89 | 49.48   | 0.99  | 1.00   | 1.07   | 1.01    |
| Q15063 | Periostin                                    | POSTN    | others | 0.99 | 0.99  | 75.24  | 1.00   | 0.99   | 0.99   | 49.94  | 1.01    | 0.99  | 1.00   | 1.07   | 1.01    |
| P05154 | Plasma serine protease inhibitor             | SERPINA5 | others | 0.99 | 0.99  | 66.37  | 40.79  | 112.26 | 786.30 | 802.80 | 1421.71 | 42.10 | 453.80 | 300.96 | 330.48  |
| P34096 | Ribonuclease 4                               | RNASE4   | others | 0.99 | 0.99  | 1.01   | 198.22 | 0.99   | 0.99   | 1.01   | 78.85   | 0.99  | 1.00   | 1.07   | 1.01    |

|            |                                                       |           |                 |      |      |       |       |      |      |      |       |       |       |        |       |
|------------|-------------------------------------------------------|-----------|-----------------|------|------|-------|-------|------|------|------|-------|-------|-------|--------|-------|
| O00391     | Sulfhydryl oxidase 1                                  | QSOX1     | others          | 0.99 | 0.99 | 1.01  | 30.61 | 0.99 | 0.99 | 1.01 | 34.67 | 0.99  | 1.00  | 1.07   | 1.01  |
| Q15582     | Transforming growth factor-beta-induced protein ig-h3 | TGFBI     | others          | 0.99 | 0.99 | 26.18 | 1.00  | 0.99 | 0.99 | 1.01 | 1.01  | 0.99  | 1.00  | 1.07   | 1.01  |
| Q9Y275     | Tumor necrosis factor ligand superfamily member 13B   | TNFSF13B  | others          | 0.99 | 0.99 | 1.01  | 1.00  | 0.99 | 0.99 | 1.01 | 1.01  | 50.11 | 79.00 | 313.73 | 29.20 |
| P01859     | Ig gamma-2 chain C region                             | IGHG2     | immunoglobulins | 0.88 | 1.91 | 1.12  | 3.15  | 0.70 | 1.71 | 0.77 | 1.59  | 0.00  | 0.00  | 0.00   | 0.00  |
| P07225     | Vitamin K-dependent protein S                         | PROS1     | coagulation     | 0.80 | 0.02 | 0.02  | 0.02  | 0.02 | 0.02 | 0.02 | 0.02  | 0.02  | 0.02  | 0.02   | 0.02  |
| P20851     | C4b-binding protein beta chain                        | C4BPB     | complement      | 0.77 | 0.02 | 0.02  | 0.02  | 0.02 | 0.02 | 0.02 | 0.02  | 1.04  | 0.02  | 0.02   | 0.02  |
| A0A087WSY6 | Immunoglobulin kappa                                  | IGKV3D-15 | immunoglobulins | 0.74 | 1.44 | 0.84  | 2.12  | 0.00 | 1.27 | 0.00 | 1.72  | 0.16  | 0.32  | 0.01   | 0.00  |

|            |                                     |           |                 |      |      |      |      |      |      |      |      |      |      |      |      |
|------------|-------------------------------------|-----------|-----------------|------|------|------|------|------|------|------|------|------|------|------|------|
|            | variable<br>3D-15                   |           |                 |      |      |      |      |      |      |      |      |      |      |      |      |
| P01034     | Cystatin-C                          | CST3      | others          | 0.65 | 0.01 | 0.01 | 0.01 | 2.74 | 1.43 | 0.46 | 2.10 | 0.01 | 0.01 | 0.01 | 0.01 |
| P02655     | Apolipoprotein C-II                 | APOC2     | apolipoproteins | 0.60 | 0.00 | 8.09 | 3.79 | 0.11 | 0.00 | 2.46 | 3.08 | 0.00 | 0.00 | 0.00 | 0.00 |
| P02749     | Beta-2-glycoprotein 1               | APOH      | apolipoproteins | 0.57 | 0.16 | 0.21 | 0.42 | 0.15 | 0.00 | 0.40 | 0.28 | 0.48 | 0.32 | 0.20 | 0.19 |
| P02751     | Fibronectin                         | FN1       | acute phase     | 0.53 | 0.54 | 1.35 | 0.44 | 0.33 | 0.41 | 1.52 | 0.99 | 0.56 | 0.73 | 2.54 | 1.17 |
| P01860     | Ig gamma-3 chain C region           | IGHG3     | immunoglobulins | 0.52 | 0.93 | 0.87 | 2.25 | 0.42 | 0.72 | 0.50 | 1.12 | 0.82 | 0.58 | 0.29 | 0.26 |
| O14791     | Apolipoprotein L1                   | APOL1     | apolipoproteins | 0.51 | 1.08 | 0.56 | 0.01 | 0.01 | 0.01 | 0.01 | 0.01 | 0.01 | 0.01 | 0.01 | 0.01 |
| A0A0C4DH25 | Immunoglobulin kappa variable 3D-20 | IGKV3D-20 | immunoglobulins | 0.48 | 0.87 | 1.23 | 0.72 | 0.00 | 0.83 | 0.00 | 0.49 | 0.00 | 0.00 | 0.00 | 0.00 |

|        |                                     |           |                 |      |      |      |      |      |      |      |       |      |      |       |       |
|--------|-------------------------------------|-----------|-----------------|------|------|------|------|------|------|------|-------|------|------|-------|-------|
| P01019 | Angiotensinogen                     | AGT       | others          | 0.45 | 0.00 | 0.00 | 0.00 | 0.37 | 0.00 | 0.00 | 0.00  | 0.00 | 0.00 | 0.00  | 0.00  |
| P01024 | Complement C3                       | C3        | complement      | 0.41 | 1.80 | 2.22 | 6.35 | 0.16 | 0.43 | 1.07 | 2.09  | 0.62 | 4.73 | 41.38 | 39.64 |
| P05155 | Plasma protease C1 inhibitor        | SERPIN G1 | others          | 0.38 | 1.30 | 0.81 | 1.09 | 0.26 | 1.24 | 0.11 | 0.29  | 0.34 | 0.92 | 0.00  | 0.11  |
| P00734 | Prothrombin                         | F2        | coagulation     | 0.35 | 0.27 | 0.01 | 0.01 | 0.01 | 0.01 | 0.01 | 0.01  | 0.01 | 0.01 | 0.01  | 0.01  |
| P0C0L5 | Complement C4-B                     | C4B       | complement      | 0.34 | 1.65 | 1.71 | 2.93 | 0.17 | 0.29 | 0.19 | 0.51  | 0.90 | 1.33 | 1.02  | 2.47  |
| P02649 | Apolipoprotein E                    | APOE      | apolipoproteins | 0.32 | 0.49 | 0.66 | 0.72 | 0.50 | 2.30 | 5.74 | 15.70 | 2.62 | 4.65 | 9.99  | 22.12 |
| P01876 | Ig alpha-1 chain C region           | IGHA1     | immunoglobulins | 0.31 | 0.22 | 0.15 | 0.06 | 0.16 | 0.04 | 0.02 | 0.00  | 0.06 | 0.07 | 0.00  | 0.07  |
| P01614 | Immunoglobulin kappa variable 2D-40 | IGKV2-40  | immunoglobulins | 0.26 | 0.72 | 1.09 | 0.00 | 0.36 | 1.54 | 0.84 | 0.36  | 0.68 | 0.62 | 0.68  | 0.79  |

|            |                                              |          |                 |      |      |      |      |      |      |      |      |      |      |      |      |
|------------|----------------------------------------------|----------|-----------------|------|------|------|------|------|------|------|------|------|------|------|------|
| A0A0B4J1V0 | Immunoglobulin heavy variable 3-15           | IGHV3-15 | immunoglobulins | 0.23 | 0.59 | 0.35 | 1.23 | 0.77 | 0.48 | 0.20 | 0.00 | 0.00 | 0.00 | 0.00 | 0.00 |
| A0A075B6I0 | Immunoglobulin lambda variable 8-61          | IGLV8-61 | immunoglobulins | 0.20 | 0.14 | 0.34 | 0.54 | 0.00 | 0.10 | 0.08 | 0.08 | 0.00 | 0.08 | 0.43 | 0.69 |
| P19823     | Inter-alpha-trypsin inhibitor heavy chain H2 | ITIH2    | others          | 0.19 | 0.18 | 0.26 | 0.21 | 0.01 | 0.01 | 0.26 | 0.25 | 0.17 | 0.01 | 0.01 | 0.01 |
| P00751     | Complement factor B                          | CFB      | complement      | 0.19 | 0.01 | 0.01 | 0.01 | 0.01 | 0.01 | 0.01 | 0.01 | 0.01 | 0.01 | 0.01 | 0.01 |
| P02765     | Alpha-2-HS-glycoprotein                      | AHSG     | others          | 0.14 | 0.00 | 0.00 | 0.00 | 0.23 | 0.00 | 0.00 | 0.00 | 0.82 | 0.10 | 0.00 | 0.00 |
| P00450     | Ceruloplasmin                                | CP       | others          | 0.14 | 0.17 | 0.00 | 0.00 | 0.00 | 0.00 | 0.00 | 0.00 | 0.00 | 0.00 | 0.00 | 0.00 |
| P06727     | Apolipoprotein A-IV                          | APOA4    | apolipoproteins | 0.13 | 0.00 | 0.00 | 0.00 | 0.39 | 0.00 | 0.00 | 0.05 | 0.52 | 0.00 | 0.00 | 0.13 |

|        |                           |          |                 |      |      |      |      |      |      |      |      |      |      |      |      |
|--------|---------------------------|----------|-----------------|------|------|------|------|------|------|------|------|------|------|------|------|
| P01011 | Alpha-1-antichymotrypsin  | SERPINA3 | acute phase     | 0.11 | 0.07 | 0.00 | 0.06 | 0.00 | 0.00 | 0.00 | 0.00 | 0.00 | 0.00 | 0.00 | 0.00 |
| P01023 | Alpha-2-macroglobulin     | A2M      | acute phase     | 0.10 | 0.03 | 0.03 | 0.07 | 0.00 | 0.00 | 0.04 | 0.08 | 0.04 | 0.02 | 0.00 | 0.05 |
| P01008 | Antithrombin-III          | SERPINC1 | coagulation     | 0.09 | 0.08 | 0.23 | 0.00 | 0.00 | 0.38 | 0.09 | 0.91 | 0.00 | 0.20 | 0.00 | 0.49 |
| P02774 | Vitamin D-binding protein | GC       | others          | 0.08 | 0.00 | 0.00 | 0.00 | 0.00 | 0.00 | 0.00 | 0.00 | 0.00 | 0.00 | 0.00 | 0.00 |
| P02652 | Apolipoprotein A-II       | APOA2    | apolipoproteins | 0.07 | 0.02 | 0.03 | 0.04 | 0.05 | 0.01 | 0.02 | 0.03 | 0.14 | 0.08 | 0.08 | 0.15 |
| P02647 | Apolipoprotein A-I        | APOA1    | apolipoproteins | 0.07 | 0.03 | 0.05 | 0.05 | 0.12 | 0.02 | 0.03 | 0.03 | 0.08 | 0.04 | 0.03 | 0.14 |
| P02787 | Serotransferrin           | TF       | others          | 0.06 | 0.02 | 0.01 | 0.01 | 0.02 | 0.01 | 0.00 | 0.00 | 0.03 | 0.02 | 0.01 | 0.03 |
| P00738 | Haptoglobin               | HP       | acute phase     | 0.06 | 0.07 | 0.04 | 0.07 | 0.00 | 0.00 | 0.01 | 0.01 | 0.03 | 0.02 | 0.05 | 0.20 |

|        |                                     |          |             |      |      |      |      |      |      |      |      |      |      |      |      |
|--------|-------------------------------------|----------|-------------|------|------|------|------|------|------|------|------|------|------|------|------|
| P02790 | Hemopexin                           | HPX      | others      | 0.05 | 0.00 | 0.00 | 0.00 | 0.25 | 0.07 | 0.12 | 0.03 | 0.07 | 0.04 | 0.02 | 0.06 |
| P02768 | Serum albumin                       | ALB      | others      | 0.04 | 0.18 | 0.03 | 0.06 | 0.03 | 0.18 | 0.03 | 0.02 | 0.21 | 0.81 | 0.13 | 0.41 |
| P01009 | Alpha-1-antitrypsin                 | SERPINA1 | acute phase | 0.03 | 0.02 | 0.01 | 0.01 | 0.04 | 0.01 | 0.01 | 0.01 | 0.03 | 0.01 | 0.01 | 0.04 |
| P07357 | Complement component C8 alpha chain | C8A      | complement  | 0.03 | 0.03 | 0.03 | 0.03 | 0.03 | 0.03 | 0.03 | 0.03 | 0.03 | 0.03 | 0.03 | 0.03 |
| P02750 | Leucine-rich alpha-2-glycoprotein   | LRG1     | others      | 0.02 | 0.02 | 0.73 | 0.02 | 0.02 | 0.02 | 0.02 | 0.02 | 0.02 | 0.02 | 0.03 | 0.02 |
| P02766 | Transthyretin                       | TTR      | others      | 0.02 | 0.01 | 0.00 | 0.00 | 0.03 | 0.01 | 0.00 | 0.00 | 0.02 | 0.02 | 0.02 | 0.04 |
| P04278 | Sex hormone-binding globulin        | SHBG     | others      | 0.02 | 0.02 | 0.02 | 0.02 | 0.02 | 0.02 | 0.02 | 0.02 | 0.02 | 0.02 | 0.02 | 0.02 |
| P35858 | Insulin-like growth factor-         | IGFALS   | others      | 0.02 | 0.02 | 0.02 | 0.02 | 0.02 | 0.02 | 0.02 | 0.02 | 0.02 | 0.02 | 0.02 | 0.02 |

|        |                                              |         |                 |      |      |      |      |      |      |      |      |      |      |      |      |
|--------|----------------------------------------------|---------|-----------------|------|------|------|------|------|------|------|------|------|------|------|------|
|        | binding protein complex acid labile subunit  |         |                 |      |      |      |      |      |      |      |      |      |      |      |      |
| P19827 | Inter-alpha-trypsin inhibitor heavy chain H1 | ITIH1   | others          | 0.02 | 0.02 | 0.02 | 0.02 | 0.02 | 0.02 | 0.02 | 0.02 | 0.02 | 0.02 | 0.02 | 0.02 |
| Q96PD5 | N-acetylmuramoyl-L-alanine amidase           | PGLYRP2 | others          | 0.01 | 0.01 | 0.01 | 0.01 | 0.01 | 0.01 | 0.01 | 0.01 | 0.01 | 0.01 | 0.01 | 0.01 |
| P19652 | Alpha-1-acid glycoprotein 2                  | ORM2    | acute phase     | 0.01 | 0.01 | 0.01 | 0.01 | 0.01 | 0.01 | 0.01 | 0.01 | 0.01 | 0.01 | 0.01 | 0.01 |
| P43652 | Afamin                                       | AFM     | others          | 0.01 | 0.01 | 0.01 | 0.01 | 0.01 | 0.01 | 0.01 | 0.01 | 0.01 | 0.01 | 0.01 | 0.01 |
| P05090 | Apolipoprotein D                             | APOD    | apolipoproteins | 0.01 | 0.01 | 0.01 | 0.01 | 0.01 | 0.01 | 0.01 | 0.01 | 0.01 | 0.01 | 0.01 | 0.01 |
| P25311 | Zinc-alpha-2-glycoprotein                    | AZGP1   | others          | 0.01 | 0.01 | 0.01 | 0.01 | 0.01 | 0.01 | 0.01 | 0.01 | 0.01 | 0.01 | 0.01 | 0.01 |



|        |                                  |          |                 |      |      |      |      |      |      |      |      |      |      |      |      |
|--------|----------------------------------|----------|-----------------|------|------|------|------|------|------|------|------|------|------|------|------|
| P01861 | Ig gamma-4 chain C region        | IGHG4    | immunoglobulins | 0.01 | 0.02 | 0.03 | 0.03 | 0.00 | 0.00 | 0.00 | 0.03 | 0.09 | 0.04 | 0.04 | 0.07 |
| P08697 | Alpha-2-antiplasmin              | SERPINF2 | others          | 0.01 | 0.01 | 0.01 | 0.01 | 0.01 | 0.01 | 0.01 | 0.01 | 0.01 | 0.01 | 0.01 | 0.01 |
| P27169 | Serum paraoxonase/arylesterase 1 | PON1     | others          | 0.01 | 0.01 | 0.01 | 0.01 | 0.01 | 0.01 | 0.01 | 0.01 | 0.01 | 0.01 | 0.01 | 0.01 |
| P04114 | Apolipoprotein B-100             | APOB     | apolipoproteins | 0.01 | 0.01 | 0.01 | 0.01 | 0.01 | 0.01 | 0.01 | 0.01 | 0.01 | 0.01 | 0.01 | 0.01 |
| P02760 | Protein AMBP                     | AMBP     | others          | 0.00 | 0.00 | 0.00 | 0.00 | 0.00 | 0.00 | 0.00 | 0.00 | 0.00 | 0.00 | 0.00 | 0.00 |
| P02753 | Retinol-binding protein 4        | RBP4     | others          | 0.00 | 0.00 | 0.00 | 0.00 | 0.00 | 0.00 | 0.00 | 0.00 | 0.00 | 0.00 | 0.00 | 0.00 |
| P0DOY3 | Immunoglobulin lambda constant 3 | IGLC3    | immunoglobulins | 0.00 | 0.00 | 0.00 | 0.00 | 0.00 | 0.00 | 0.00 | 0.00 | 1.62 | 1.59 | 1.06 | 1.30 |
| P04217 | Alpha-1B-glycoprotein            | A1BG     | others          | 0.00 | 0.00 | 0.00 | 0.00 | 0.00 | 0.00 | 0.00 | 0.00 | 0.00 | 0.00 | 0.00 | 0.00 |

|        |                             |      |             |      |      |      |      |      |      |      |      |      |      |      |      |
|--------|-----------------------------|------|-------------|------|------|------|------|------|------|------|------|------|------|------|------|
| P02763 | Alpha-1-acid glycoprotein 1 | ORM1 | acute phase | 0.00 | 0.05 | 0.00 | 0.00 | 0.00 | 0.00 | 0.00 | 0.00 | 0.00 | 0.00 | 0.00 | 0.00 |
|--------|-----------------------------|------|-------------|------|------|------|------|------|------|------|------|------|------|------|------|

**Table S6.** Key proteins within the protein coronas that are highly correlated to the association of the nanoparticle systems (12 types of nanoparticles i.e., three nanoparticle systems with and without precoating) with B cells, neutrophils, CD14+ monocytes, and CD16+ monocytes<sup>a</sup>

|                 | <b>Protein ID</b> | <b>Protein name</b>                          | <b>Gene name</b> | <b>correlation coefficient</b> | <b>-log<sub>10</sub>(p-value)</b> |
|-----------------|-------------------|----------------------------------------------|------------------|--------------------------------|-----------------------------------|
| B cells         | P02679            | Fibrinogen gamma chain                       | FGG              | -0.57                          | 4.20                              |
|                 | P05154            | Plasma serine protease inhibitor             | SERPINA5         | -0.59                          | 4.09                              |
|                 | Q14624            | Inter-alpha-trypsin inhibitor heavy chain H4 | ITIH4            | 0.86                           | 10.70                             |
|                 | P01871            | Ig mu chain C region                         | IGHM             | 0.70                           | 5.70                              |
|                 | P01591            | Immunoglobulin J chain                       | IGJ              | 0.65                           | 4.80                              |
|                 | P00738            | Haptoglobin                                  | HP               | 0.65                           | 4.80                              |
|                 | P09871            | Complement C1s subcomponent                  | C1S              | 0.65                           | 4.74                              |
|                 | P01876            | Ig alpha-1 chain C region                    | IGHA1            | 0.62                           | 4.31                              |
|                 | P10909            | Clusterin                                    | CLU              | 0.60                           | 4.23                              |
| neutrophils     | P01042            | Kininogen-1                                  | KNG1             | -0.74                          | 6.72                              |
|                 | P17936            | Insulin-like growth factor-binding protein 3 | IGFBP3           | -0.70                          | 5.78                              |
|                 | P02649            | Apolipoprotein E                             | APOE             | -0.68                          | 5.35                              |
|                 | P60709            | Actin, cytoplasmic 1                         | ACTB             | -0.65                          | 4.72                              |
|                 | P01876            | Ig alpha-1 chain C region                    | IGHA1            | 0.60                           | 4.01                              |
| CD14+ monocytes | P60709            | Actin, cytoplasmic 1                         | ACTB             | -0.72                          | 6.19                              |
|                 | P02649            | Apolipoprotein E                             | APOE             | -0.68                          | 5.35                              |
|                 | P02795            | Metallothionein-2                            | MT2A             | -0.67                          | 5.12                              |
|                 | P01042            | Kininogen-1                                  | KNG1             | -0.66                          | 4.87                              |
|                 | P17936            | Insulin-like growth factor-binding protein 3 | IGFBP3           | -0.61                          | 4.17                              |
|                 | P01876            | Ig alpha-1 chain C region                    | IGHA1            | 0.60                           | 4.01                              |
| CD16+ monocytes | P01042            | Kininogen-1                                  | KNG1             | -0.82                          | 8.94                              |
|                 | P55056            | Apolipoprotein C-IV                          | APOC4            | -0.74                          | 6.49                              |

|        |                                              |        |       |      |
|--------|----------------------------------------------|--------|-------|------|
| P60709 | Actin, cytoplasmic 1                         | ACTB   | -0.71 | 5.85 |
| P61626 | Lysozyme C                                   | LYZ    | -0.70 | 5.70 |
| P17936 | Insulin-like growth factor-binding protein 3 | IGFBP3 | -0.69 | 5.51 |
| P35542 | Serum amyloid A-4 protein                    | SAA4   | -0.67 | 5.12 |
| Q03591 | Complement factor H-related protein 1        | CFHR1  | -0.65 | 4.72 |
| P02649 | Apolipoprotein E                             | APOE   | -0.65 | 4.66 |
| P04004 | Vitronectin                                  | VTN    | -0.63 | 4.44 |
| P01861 | Ig gamma-4 chain C region                    | IGHG4  | -0.63 | 4.42 |
| P08603 | Complement factor H                          | CFH    | -0.62 | 4.30 |
| P01024 | Complement C3                                | C3     | -0.61 | 4.17 |
| P03952 | Plasma kallikrein                            | KLKB1  | -0.61 | 4.14 |
| P02775 | Platelet basic protein                       | PPBP   | -0.61 | 4.10 |
| P18065 | Insulin-like growth factor-binding protein 2 | IGFBP2 | -0.59 | 4.08 |
| P01859 | Ig gamma-2 chain C region                    | IGHG2  | 0.63  | 4.37 |
| P0DOX8 | Immunoglobulin lambda-1 light chain          | N/A    | 0.59  | 4.04 |
| P0DOX7 | Immunoglobulin kappa light chain             | N/A    | 0.59  | 4.02 |

<sup>a</sup>Proteins highlighted in blue indicate negative correlation and proteins highlighted in red indicate positive correlation.

## Checklist

### Minimum Information Reporting in Bio–Nano Experimental Literature

The MIRIBEL guidelines were introduced here: <https://doi.org/10.1038/s41565-018-0246-4>

The development of these guidelines was led by the ARC Centre of Excellence in Convergent Bio-Nano Science and Technology: <https://www.cbns.org.au/>. Any updates or revisions to this document will be made available here: <http://doi.org/10.17605/OSF.IO/SMVTF>. This document is made available under a CC-BY 4.0 license: <https://creativecommons.org/licenses/by/4.0/>.

The MIRIBEL guidelines were developed to facilitate reporting and dissemination of research in bio–nano science. Their development was inspired by various similar efforts:

- MIAME (microarray experiments): *Nat. Genet.* **29** (2001), 365; <http://doi.org/10.1038/ng1201-365>
- MIRIAM (biochemical models): *Nat. Biotechnol.* **23** (2005) 1509; <http://doi.org/10.1038/nbt1156>
- MIBBI (biology/biomedicine): *Nat. Biotechnol.* **26** (2008) 889; <http://doi.org/10.1038/nbt.1411>
- MIGS (genome sequencing): *Nat. Biotechnol.* **26** (2008) 541; <http://doi.org/10.1038/nbt1360>
- MIQE (quantitative PCR): *Clin. Chem.* **55** (2009) 611; <http://doi.org/10.1373/clinchem.2008.112797>
- ARRIVE (animal research): *PLOS Biol.* **8** (2010) e1000412; <http://doi.org/10.1371/journal.pbio.1000412>
- *Nature*'s reporting standards:
  - Life science: <https://www.nature.com/authors/policies/reporting.pdf>; e.g., *Nat. Nanotechnol.* **9** (2014) 949; <http://doi.org/10.1038/nnano.2014.287>
  - Solar cells: <https://www.nature.com/authors/policies/solarchecklist.pdf>; e.g., *Nat. Photonics* **9** (2015) 703; <http://doi.org/10.1038/nphoton.2015.233>
  - Lasers: <https://www.nature.com/authors/policies/laserchecklist.pdf>; e.g., *Nat. Photonics* **11** (2017) 139; <http://doi.org/10.1038/nphoton.2017.28>
- The “TOP guidelines”: e.g., *Science* **352** (2016) 1147; <http://doi.org/10.1126/science.aag2359>

Similar to many of the efforts listed above, the parameters included in this checklist are **not** intended to be definitive requirements; instead they are intended as ‘points to be considered’, with authors themselves deciding which parameters are—and which are not—appropriate for their specific study.

This document is intended to be a living document, which we propose is revisited and amended annually by interested members of the community, who are encouraged to contact the authors of this document. Parts of this document were developed at the annual International Nanomedicine Conference in Sydney, Australia: <http://www.oznanomed.org/>, which will continue to act as a venue for their review and development, and interested members of the community are encouraged to attend.

After filling out the following pages, this checklist document can be attached as a “Supporting Information” document during submission of a manuscript to inform Editors and Reviewers (and eventually readers) that all points of MIRIBEL have been considered.

**Supplementary Table 1. Material characterization\***

| Question                                                                                                                                                                                                                                                                                                                                                                                                                                                                                                                                                                                                                                                                     | Yes            | No |
|------------------------------------------------------------------------------------------------------------------------------------------------------------------------------------------------------------------------------------------------------------------------------------------------------------------------------------------------------------------------------------------------------------------------------------------------------------------------------------------------------------------------------------------------------------------------------------------------------------------------------------------------------------------------------|----------------|----|
| 1.1 Are “ <b>best reporting practices</b> ” <b>available</b> for the nanomaterial used? For examples, see <i>Chem. Mater.</i> <b>28</b> (2016) 3535; <a href="http://doi.org/10.1021/acs.chemmater.6b01854">http://doi.org/10.1021/acs.chemmater.6b01854</a> and <i>Chem. Mater.</i> <b>29</b> (2017) 1; <a href="http://doi.org/10.1021/acs.chemmater.6b05235">http://doi.org/10.1021/acs.chemmater.6b05235</a>                                                                                                                                                                                                                                                             |                | N  |
| 1.2 If they are available, <b>are they used</b> ? If not available, ignore this question and proceed to the next one.                                                                                                                                                                                                                                                                                                                                                                                                                                                                                                                                                        |                |    |
| 1.3 Are extensive and clear instructions reported detailing all steps of <b>synthesis</b> and the resulting <b>composition</b> of the nanomaterial? For examples, see <i>Chem. Mater.</i> <b>26</b> (2014) 1765; <a href="http://doi.org/10.1021/cm500632c">http://doi.org/10.1021/cm500632c</a> , and <i>Chem. Mater.</i> <b>26</b> (2014) 2211; <a href="http://doi.org/10.1021/cm5010449">http://doi.org/10.1021/cm5010449</a> . Extensive use of photos, images, and videos are strongly encouraged. For example, see <i>Chem. Mater.</i> <b>28</b> (2016) 8441; <a href="http://doi.org/10.1021/acs.chemmater.6b04639">http://doi.org/10.1021/acs.chemmater.6b04639</a> | Y              |    |
| 1.4 Is the <b>size</b> (or <b>dimensions</b> , if non-spherical) and <b>shape of</b> the nanomaterial reported?                                                                                                                                                                                                                                                                                                                                                                                                                                                                                                                                                              | Y              |    |
| 1.5 Is the <b>size dispersity</b> or <b>aggregation</b> of the nanomaterial reported?                                                                                                                                                                                                                                                                                                                                                                                                                                                                                                                                                                                        | Y              |    |
| 1.6 Is the <b>zeta potential</b> of the nanomaterial reported?                                                                                                                                                                                                                                                                                                                                                                                                                                                                                                                                                                                                               | Y              |    |
| 1.7 Is the <b>density (mass/volume)</b> of the nanomaterial reported?                                                                                                                                                                                                                                                                                                                                                                                                                                                                                                                                                                                                        |                | N  |
| 1.8 Is the amount of any <b>drug loaded</b> reported? ‘Drug’ here broadly refers to functional cargos (e.g., proteins, small molecules, nucleic acids).                                                                                                                                                                                                                                                                                                                                                                                                                                                                                                                      | not applicable |    |
| 1.9 Is the <b>targeting performance</b> of the nanomaterial reported, including <b>amount</b> of ligand bound to the nanomaterial if the material has been functionalised through addition of targeting ligands?                                                                                                                                                                                                                                                                                                                                                                                                                                                             | not applicable |    |
| 1.10 Is the <b>label signal</b> per nanomaterial/particle reported? For example, fluorescence signal per particle for fluorescently labelled nanomaterials.                                                                                                                                                                                                                                                                                                                                                                                                                                                                                                                  | Y              |    |
| 1.11 If a material property not listed here is varied, has it been <b>quantified</b> ?                                                                                                                                                                                                                                                                                                                                                                                                                                                                                                                                                                                       | not applicable |    |
| 1.12 Were characterizations performed in a <b>fluid mimicking biological conditions</b> ?                                                                                                                                                                                                                                                                                                                                                                                                                                                                                                                                                                                    | Y              |    |
| 1.13 Are details of how these parameters were <b>measured/estimated</b> provided?                                                                                                                                                                                                                                                                                                                                                                                                                                                                                                                                                                                            | Y              |    |
| <p>Explanation for No:</p> <p>1.1 The protein corona effect of nanocapsules has not been fully studied in previous literature.</p> <p>1.7 Density calculations involve the measurement of the weight of a known number of nanoparticles. To minimize measurement errors, a large amount of nanoparticles need to be engineered, which is beyond the production scale in standard laboratories.</p>                                                                                                                                                                                                                                                                           |                |    |

**Supplementary Table 2. Biological characterization\***

| Question                                                                                                                                                                                                                                                                                                                                                                                                                                                                                                                            | Yes            | No |
|-------------------------------------------------------------------------------------------------------------------------------------------------------------------------------------------------------------------------------------------------------------------------------------------------------------------------------------------------------------------------------------------------------------------------------------------------------------------------------------------------------------------------------------|----------------|----|
| 2.1 Are <b>cell seeding details</b> , including <b>number of cells plated, confluency at start of experiment, and time between seeding and experiment</b> reported?                                                                                                                                                                                                                                                                                                                                                                 | Y              |    |
| 2.2 If a standardised cell line is used, are the <b>designation and source</b> provided?                                                                                                                                                                                                                                                                                                                                                                                                                                            | Y              |    |
| 2.3 Is the <b>passage number</b> (total number of times a cell culture has been subcultured) known and reported?                                                                                                                                                                                                                                                                                                                                                                                                                    | Y              |    |
| 2.4 Is the last instance of <b>verification of cell line</b> reported? If no verification has been performed, is the time passed and passage number since acquisition from trusted source (e.g., ATCC or ECACC) reported? For information, see <i>Science</i> <b>347</b> (2015) 938; <a href="http://doi.org/10.1126/science.347.6225.938">http://doi.org/10.1126/science.347.6225.938</a>                                                                                                                                          | Y              |    |
| 2.5 Are the results from <b>mycoplasma testing</b> of cell cultures reported?                                                                                                                                                                                                                                                                                                                                                                                                                                                       | Y              |    |
| 2.6 Is the <b>background signal of cells/tissue</b> reported? (E.g., the fluorescence signal of cells without particles in the case of a flow cytometry experiment.)                                                                                                                                                                                                                                                                                                                                                                | Y              |    |
| 2.7 Are <b>toxicity studies</b> provided to demonstrate that the material has the expected toxicity, and that the experimental protocol followed does not?                                                                                                                                                                                                                                                                                                                                                                          | Y              |    |
| 2.8 Are details of media preparation ( <b>type of media, serum, any added antibiotics</b> ) provided?                                                                                                                                                                                                                                                                                                                                                                                                                               | Y              |    |
| 2.9 Is a <b>justification of the biological model</b> used provided? For examples for cancer models, see <i>Cancer Res.</i> <b>75</b> (2015) 4016; <a href="http://doi.org/10.1158/0008-5472.CAN-15-1558">http://doi.org/10.1158/0008-5472.CAN-15-1558</a> , and <i>Mol. Ther.</i> <b>20</b> (2012) 882; <a href="http://doi.org/10.1038/mt.2012.73">http://doi.org/10.1038/mt.2012.73</a> , and <i>ACS Nano</i> <b>11</b> (2017) 9594; <a href="http://doi.org/10.1021/acsnano.7b04855">http://doi.org/10.1021/acsnano.7b04855</a> | Y              |    |
| 2.10 Is characterization of the <b>biological fluid</b> ( <i>ex vivo/in vitro</i> ) reported? For example, when investigating protein adsorption onto nanoparticles dispersed in blood serum, pertinent aspects of the blood serum should be characterised (e.g., protein concentrations and differences between donors used in study).                                                                                                                                                                                             | Y              |    |
| 2.11 For <b>animal experiments</b> , are the ARRIVE guidelines followed? For details, see <i>PLOS Biol.</i> <b>8</b> (2010) e1000412; <a href="http://doi.org/10.1371/journal.pbio.1000412">http://doi.org/10.1371/journal.pbio.1000412</a>                                                                                                                                                                                                                                                                                         | not applicable |    |
| Explanation for <b>No</b> (if needed):                                                                                                                                                                                                                                                                                                                                                                                                                                                                                              |                |    |

**Supplementary Table 3. Experimental details\***

| Question                                                                                                                                                                                                                                                                                                                                                                                                                                                                                                                                                                                                                                          | Yes            | No |
|---------------------------------------------------------------------------------------------------------------------------------------------------------------------------------------------------------------------------------------------------------------------------------------------------------------------------------------------------------------------------------------------------------------------------------------------------------------------------------------------------------------------------------------------------------------------------------------------------------------------------------------------------|----------------|----|
| 3.1 For cell culture experiments: are <b>cell culture dimensions</b> including <b>type of well, volume of added media</b> , reported? Are cell types (i.e.; adherent vs suspension) and <b>orientation</b> (if non-standard) reported?                                                                                                                                                                                                                                                                                                                                                                                                            | Y              |    |
| 3.2 Is the <b>dose of material administered</b> reported? This is typically provided in nanomaterial mass, volume, number, or surface area added. Is sufficient information reported so that regardless of which one is provided, the other dosage metrics can be calculated (i.e. using the dimensions and density of the nanomaterial)?                                                                                                                                                                                                                                                                                                         | Y              |    |
| 3.3 For each type of imaging performed, are details of how <b>imaging</b> was performed provided, including details of <b>shielding, non-uniform image processing</b> , and any <b>contrast agents</b> added?                                                                                                                                                                                                                                                                                                                                                                                                                                     | not applicable |    |
| 3.4 Are details of how the dose was administered provided, including <b>method of administration, injection location, rate of administration</b> , and details of <b>multiple injections</b> ?                                                                                                                                                                                                                                                                                                                                                                                                                                                    | not applicable |    |
| 3.5 Is the methodology used to <b>equalise dosage</b> provided?                                                                                                                                                                                                                                                                                                                                                                                                                                                                                                                                                                                   | not applicable |    |
| 3.6 Is the <b>delivered dose</b> to tissues and/or organs (in vivo) reported, as % injected dose per gram of tissue (%ID g <sup>-1</sup> )?                                                                                                                                                                                                                                                                                                                                                                                                                                                                                                       | not applicable |    |
| 3.7 Is <b>mass of each organ/tissue measured</b> and <b>mass of material</b> reported?                                                                                                                                                                                                                                                                                                                                                                                                                                                                                                                                                            | not applicable |    |
| 3.8 Are the <b>signals of cells/tissues with nanomaterials</b> reported? For instance, for fluorescently labelled nanoparticles, the total number of particles per cell or the fluorescence intensity of particles + cells, at each assessed timepoint.                                                                                                                                                                                                                                                                                                                                                                                           | Y              |    |
| 3.9 Are <b>data analysis details</b> , including <b>code used</b> for analysis provided?                                                                                                                                                                                                                                                                                                                                                                                                                                                                                                                                                          | Y              |    |
| 3.10 Is the <b>raw data</b> or <b>distribution of values</b> underlying the reported results provided? For examples, see <i>R. Soc. Open Sci.</i> <b>3</b> (2016) 150547; <a href="http://doi.org/10.1098/rsos.150547">http://doi.org/10.1098/rsos.150547</a> , <a href="https://opennessinitiative.org/making-your-data-public/">https://opennessinitiative.org/making-your-data-public/</a> , <a href="http://journals.plos.org/plosone/s/data-availability">http://journals.plos.org/plosone/s/data-availability</a> , and <a href="https://www.nature.com/sdata/policies/repositories">https://www.nature.com/sdata/policies/repositories</a> | Y              |    |
| Explanation for <b>No</b> (if needed):                                                                                                                                                                                                                                                                                                                                                                                                                                                                                                                                                                                                            |                |    |
